# Supplementary material for: Hepatic nuclear factor 4 alpha promotes the ferroptosis of lung adenocarcinoma via transcriptional activation of cytochrome P450 oxidoreductase
Source: PeerJ. 2023 May 8;11:e15377. doi: 10.7717/peerj.15377 (PMC10174064; doi:10.7717/peerj.15377)
Supplement: Supplemental Information 1 [file peerj-11-15377-s001.xlsx]

## Sheet: Figure 1A
	DMSO	RSL3	IKE
FPKM	39.4295	17.1858	11.5233
	39.7919	16.3376	11.9939
