# Supplementary material for: Hepatic nuclear factor 4 alpha promotes the ferroptosis of lung adenocarcinoma via transcriptional activation of cytochrome P450 oxidoreductase
Source: PeerJ. 2023 May 8;11:e15377. doi: 10.7717/peerj.15377 (PMC10174064; doi:10.7717/peerj.15377)
Supplement: Supplemental Information 2 [file peerj-11-15377-s002.xlsx]

## Sheet: Sheet1
Well	Well Position	Omit	Sample Name	Target Name	Task	Reporter	Quencher	CT	Ct Mean	Ct SD	Delta Ct Mean
1	A1	FALSE	control-1	ACTB	UNKNOWN	SYBR	None	17.3436	17.3095	0.107543
2	B1	FALSE	control-2	ACTB	UNKNOWN	SYBR	None	17.7557	17.6374	0.114894
3	C1	FALSE	control-3	ACTB	UNKNOWN	SYBR	None	16.3779	16.9512	0.57652
4	D1	FALSE	RSL3-1	ACTB	UNKNOWN	SYBR	None	16.8054	16.793	0.322932
5	E1	FALSE	RSL3-2	ACTB	UNKNOWN	SYBR	None	16.7475	17.0531	0.301254
6	F1	FALSE	RSL3-3	ACTB	UNKNOWN	SYBR	None	17.3849	17.0796	0.269239
7	G1	FALSE	IKE-1	ACTB	UNKNOWN	SYBR	None	15.9151	15.6037	0.285406
8	H1	FALSE	IKE-2	ACTB	UNKNOWN	SYBR	None	16.3595	15.8219	0.488464
9	I1	FALSE	IKE-3	ACTB	UNKNOWN	SYBR	None	16.4341	16.1655	0.319552
10	J1	FALSE	DFO-1	ACTB	UNKNOWN	SYBR	None	16.3947	16.2476	0.174626
11	K1	FALSE	DFO-2	ACTB	UNKNOWN	SYBR	None	17.6421	17.2561	0.562388
12	L1	FALSE	DFO-3	ACTB	UNKNOWN	SYBR	None	17.1441	16.7416	0.348694
13	M1	FALSE	RSL3_DFO-1	ACTB	UNKNOWN	SYBR	None	16.5404	16.6294	0.262152
14	N1	FALSE	RSL3_DFO-2	ACTB	UNKNOWN	SYBR	None	18.4321	18.0034	0.40385
15	O1	FALSE	RSL3_DFO-3	ACTB	UNKNOWN	SYBR	None	17.7072	17.3387	0.347277
16	P1	FALSE	IKE_DFO-1	ACTB	UNKNOWN	SYBR	None	17.4165	17.5715	0.224962
17	Q1	FALSE	IKE_DFO-2	ACTB	UNKNOWN	SYBR	None	17.1179	17.4416	0.441465
18	R1	FALSE	IKE_DFO-3	ACTB	UNKNOWN	SYBR	None	17.3012	17.2896	0.23297
19	A2	FALSE	control-1	ACTB	UNKNOWN	SYBR	None	17.3958	17.3095	0.107543
20	B2	FALSE	control-2	ACTB	UNKNOWN	SYBR	None	17.5262	17.6374	0.114894
21	C2	FALSE	control-3	ACTB	UNKNOWN	SYBR	None	17.5309	16.9512	0.57652
22	D2	FALSE	RSL3-1	ACTB	UNKNOWN	SYBR	None	16.4641	16.793	0.322932
23	E2	FALSE	RSL3-2	ACTB	UNKNOWN	SYBR	None	17.062	17.0531	0.301254
24	F2	FALSE	RSL3-3	ACTB	UNKNOWN	SYBR	None	16.9776	17.0796	0.269239
25	G2	FALSE	IKE-1	ACTB	UNKNOWN	SYBR	None	15.5414	15.6037	0.285406
26	H2	FALSE	IKE-2	ACTB	UNKNOWN	SYBR	None	15.4053	15.8219	0.488464
27	I2	FALSE	IKE-3	ACTB	UNKNOWN	SYBR	None	16.2504	16.1655	0.319552
28	J2	FALSE	DFO-1	ACTB	UNKNOWN	SYBR	None	16.2934	16.2476	0.174626
29	K2	FALSE	DFO-2	ACTB	UNKNOWN	SYBR	None	17.5152	17.2561	0.562388
30	L2	FALSE	DFO-3	ACTB	UNKNOWN	SYBR	None	16.5471	16.7416	0.348694
31	M2	FALSE	RSL3_DFO-1	ACTB	UNKNOWN	SYBR	None	16.4233	16.6294	0.262152
32	N2	FALSE	RSL3_DFO-2	ACTB	UNKNOWN	SYBR	None	17.9478	18.0034	0.40385
33	O2	FALSE	RSL3_DFO-3	ACTB	UNKNOWN	SYBR	None	17.2914	17.3387	0.347277
34	P2	FALSE	IKE_DFO-1	ACTB	UNKNOWN	SYBR	None	17.8295	17.5715	0.224962
35	Q2	FALSE	IKE_DFO-2	ACTB	UNKNOWN	SYBR	None	17.9445	17.4416	0.441465
36	R2	FALSE	IKE_DFO-3	ACTB	UNKNOWN	SYBR	None	17.0511	17.2896	0.23297
37	A3	FALSE	control-1	ACTB	UNKNOWN	SYBR	None	17.189	17.3095	0.107543
38	B3	FALSE	control-2	ACTB	UNKNOWN	SYBR	None	17.6304	17.6374	0.114894
39	C3	FALSE	control-3	ACTB	UNKNOWN	SYBR	None	16.9447	16.9512	0.57652
40	D3	FALSE	RSL3-1	ACTB	UNKNOWN	SYBR	None	17.1096	16.793	0.322932
41	E3	FALSE	RSL3-2	ACTB	UNKNOWN	SYBR	None	17.3498	17.0531	0.301254
42	F3	FALSE	RSL3-3	ACTB	UNKNOWN	SYBR	None	16.8762	17.0796	0.269239
43	G3	FALSE	IKE-1	ACTB	UNKNOWN	SYBR	None	15.3546	15.6037	0.285406
44	H3	FALSE	IKE-2	ACTB	UNKNOWN	SYBR	None	15.701	15.8219	0.488464
45	I3	FALSE	IKE-3	ACTB	UNKNOWN	SYBR	None	15.8121	16.1655	0.319552
46	J3	FALSE	DFO-1	ACTB	UNKNOWN	SYBR	None	16.0546	16.2476	0.174626
47	K3	FALSE	DFO-2	ACTB	UNKNOWN	SYBR	None	16.6108	17.2561	0.562388
48	L3	FALSE	DFO-3	ACTB	UNKNOWN	SYBR	None	16.5335	16.7416	0.348694
49	M3	FALSE	RSL3_DFO-1	ACTB	UNKNOWN	SYBR	None	16.9244	16.6294	0.262152
50	N3	FALSE	RSL3_DFO-2	ACTB	UNKNOWN	SYBR	None	17.6302	18.0034	0.40385
51	O3	FALSE	RSL3_DFO-3	ACTB	UNKNOWN	SYBR	None	17.0175	17.3387	0.347277
52	P3	FALSE	IKE_DFO-1	ACTB	UNKNOWN	SYBR	None	17.4685	17.5715	0.224962
53	Q3	FALSE	IKE_DFO-2	ACTB	UNKNOWN	SYBR	None	17.2624	17.4416	0.441465
54	R3	FALSE	IKE_DFO-3	ACTB	UNKNOWN	SYBR	None	17.5166	17.2896	0.23297
55	A4	FALSE	control-1	HNF4A	UNKNOWN	SYBR	None	24.2421	24.2713	0.417627	6.96178
56	B4	FALSE	control-2	HNF4A	UNKNOWN	SYBR	None	24.8107	24.7475	0.442544	7.11003
57	C4	FALSE	control-3	HNF4A	UNKNOWN	SYBR	None	23.8618	23.8749	0.497235	6.92375
58	D4	FALSE	RSL3-1	HNF4A	UNKNOWN	SYBR	None	24.5627	24.4923	0.270129	7.69928
59	E4	FALSE	RSL3-2	HNF4A	UNKNOWN	SYBR	None	25.4954	25.3405	0.351747	8.28739
60	F4	FALSE	RSL3-3	HNF4A	UNKNOWN	SYBR	None	24.7308	24.9787	0.23778	7.89912
61	G4	FALSE	IKE-1	HNF4A	UNKNOWN	SYBR	None	23.3203	23.5949	0.240165	7.99123
62	H4	FALSE	IKE-2	HNF4A	UNKNOWN	SYBR	None	23.9626	24.1646	0.460285	8.34265
63	I4	FALSE	IKE-3	HNF4A	UNKNOWN	SYBR	None	23.9964	24.0954	0.195401	7.92986
64	J4	FALSE	DFO-1	HNF4A	UNKNOWN	SYBR	None	22.9497	23.0256	0.287454	6.77805
65	K4	FALSE	DFO-2	HNF4A	UNKNOWN	SYBR	None	23.9711	24.1268	0.137941	6.87074
66	L4	FALSE	DFO-3	HNF4A	UNKNOWN	SYBR	None	24.2929	23.7266	0.492429	6.98501
67	M4	FALSE	RSL3_DFO-1	HNF4A	UNKNOWN	SYBR	None	23.4186	23.3656	0.080115	6.73624
68	N4	FALSE	RSL3_DFO-2	HNF4A	UNKNOWN	SYBR	None	24.7796	24.7729	0.24909	6.76949
69	O4	FALSE	RSL3_DFO-3	HNF4A	UNKNOWN	SYBR	None	24.4327	24.2592	0.204922	6.92056
70	P4	FALSE	IKE_DFO-1	HNF4A	UNKNOWN	SYBR	None	24.4736	24.4781	0.276017	6.90662
71	Q4	FALSE	IKE_DFO-2	HNF4A	UNKNOWN	SYBR	None	24.2401	24.4502	0.198486	7.0086
72	R4	FALSE	IKE_DFO-3	HNF4A	UNKNOWN	SYBR	None	24.4561	24.1891	0.314374	6.8995
73	A5	FALSE	control-1	HNF4A	UNKNOWN	SYBR	None	24.7027	24.2713	0.417627	6.96178
74	B5	FALSE	control-2	HNF4A	UNKNOWN	SYBR	None	25.155	24.7475	0.442544	7.11003
75	C5	FALSE	control-3	HNF4A	UNKNOWN	SYBR	None	23.3844	23.8749	0.497235	6.92375
76	D5	FALSE	RSL3-1	HNF4A	UNKNOWN	SYBR	None	24.7202	24.4923	0.270129	7.69928
77	E5	FALSE	RSL3-2	HNF4A	UNKNOWN	SYBR	None	24.9379	25.3405	0.351747	8.28739
78	F5	FALSE	RSL3-3	HNF4A	UNKNOWN	SYBR	None	25.2049	24.9787	0.23778	7.89912
79	G5	FALSE	IKE-1	HNF4A	UNKNOWN	SYBR	None	23.6993	23.5949	0.240165	7.99123
80	H5	FALSE	IKE-2	HNF4A	UNKNOWN	SYBR	None	23.8399	24.1646	0.460285	8.34265
81	I5	FALSE	IKE-3	HNF4A	UNKNOWN	SYBR	None	23.9692	24.0954	0.195401	7.92986
82	J5	FALSE	DFO-1	HNF4A	UNKNOWN	SYBR	None	23.3434	23.0256	0.287454	6.77805
83	K5	FALSE	DFO-2	HNF4A	UNKNOWN	SYBR	None	24.1756	24.1268	0.137941	6.87074
84	L5	FALSE	DFO-3	HNF4A	UNKNOWN	SYBR	None	23.3989	23.7266	0.492429	6.98501
85	M5	FALSE	RSL3_DFO-1	HNF4A	UNKNOWN	SYBR	None	23.4048	23.3656	0.080115	6.73624
86	N5	FALSE	RSL3_DFO-2	HNF4A	UNKNOWN	SYBR	None	24.5204	24.7729	0.24909	6.76949
87	O5	FALSE	RSL3_DFO-3	HNF4A	UNKNOWN	SYBR	None	24.0331	24.2592	0.204922	6.92056
88	P5	FALSE	IKE_DFO-1	HNF4A	UNKNOWN	SYBR	None	24.7563	24.4781	0.276017	6.90662
89	Q5	FALSE	IKE_DFO-2	HNF4A	UNKNOWN	SYBR	None	24.476	24.4502	0.198486	7.0086
90	R5	FALSE	IKE_DFO-3	HNF4A	UNKNOWN	SYBR	None	23.8426	24.1891	0.314374	6.8995
91	A6	FALSE	control-1	HNF4A	UNKNOWN	SYBR	None	23.869	24.2713	0.417627	6.96178
92	B6	FALSE	control-2	HNF4A	UNKNOWN	SYBR	None	24.2767	24.7475	0.442544	7.11003
93	C6	FALSE	control-3	HNF4A	UNKNOWN	SYBR	None	24.3786	23.8749	0.497235	6.92375
94	D6	FALSE	RSL3-1	HNF4A	UNKNOWN	SYBR	None	24.1939	24.4923	0.270129	7.69928
95	E6	FALSE	RSL3-2	HNF4A	UNKNOWN	SYBR	None	25.5883	25.3405	0.351747	8.28739
96	F6	FALSE	RSL3-3	HNF4A	UNKNOWN	SYBR	None	25.0005	24.9787	0.23778	7.89912
97	G6	FALSE	IKE-1	HNF4A	UNKNOWN	SYBR	None	23.7653	23.5949	0.240165	7.99123
98	H6	FALSE	IKE-2	HNF4A	UNKNOWN	SYBR	None	24.6913	24.1646	0.460285	8.34265
99	I6	FALSE	IKE-3	HNF4A	UNKNOWN	SYBR	None	24.3204	24.0954	0.195401	7.92986
100	J6	FALSE	DFO-1	HNF4A	UNKNOWN	SYBR	None	22.7837	23.0256	0.287454	6.77805
101	K6	FALSE	DFO-2	HNF4A	UNKNOWN	SYBR	None	24.2337	24.1268	0.137941	6.87074
102	L6	FALSE	DFO-3	HNF4A	UNKNOWN	SYBR	None	23.488	23.7266	0.492429	6.98501
103	M6	FALSE	RSL3_DFO-1	HNF4A	UNKNOWN	SYBR	None	23.2734	23.3656	0.080115	6.73624
104	N6	FALSE	RSL3_DFO-2	HNF4A	UNKNOWN	SYBR	None	25.0185	24.7729	0.24909	6.76949
105	O6	FALSE	RSL3_DFO-3	HNF4A	UNKNOWN	SYBR	None	24.3119	24.2592	0.204922	6.92056
106	P6	FALSE	IKE_DFO-1	HNF4A	UNKNOWN	SYBR	None	24.2044	24.4781	0.276017	6.90662
107	Q6	FALSE	IKE_DFO-2	HNF4A	UNKNOWN	SYBR	None	24.6345	24.4502	0.198486	7.0086
108	R6	FALSE	IKE_DFO-3	HNF4A	UNKNOWN	SYBR	None	24.2686	24.1891	0.314374	6.8995
