# Supplementary material for: Hepatic nuclear factor 4 alpha promotes the ferroptosis of lung adenocarcinoma via transcriptional activation of cytochrome P450 oxidoreductase
Source: PeerJ. 2023 May 8;11:e15377. doi: 10.7717/peerj.15377 (PMC10174064; doi:10.7717/peerj.15377)
Supplement: Supplemental Information 4 [file peerj-11-15377-s004.xlsx]

## Sheet: Figure 2A
	A549	CALU3	H23	H358	H1650	H1975	HCC827	PC9
log2(FPKM+1)	4.01436	2.62761	0.137504	0.070389	0.028569	0.084064	0.042644	0.137504
