# Supplementary material for: Hepatic nuclear factor 4 alpha promotes the ferroptosis of lung adenocarcinoma via transcriptional activation of cytochrome P450 oxidoreductase
Source: PeerJ. 2023 May 8;11:e15377. doi: 10.7717/peerj.15377 (PMC10174064; doi:10.7717/peerj.15377)
Supplement: Supplemental Information 5 [file peerj-11-15377-s005.xlsx]

## Sheet: Figure 2B-A549
Well	Well Position	Omit	Sample Name	Target Name	Task	Reporter	Quencher	CT	Ct Mean	Ct SD	Delta Ct Mean
1	A1	FALSE	NC-1	ACTB	UNKNOWN	SYBR	None	16.9159	17.1569	0.213074
2	B1	FALSE	NC-2	ACTB	UNKNOWN	SYBR	None	18.6929	18.7483	0.102679
3	C1	FALSE	NC-3	ACTB	UNKNOWN	SYBR	None	17.555	17.5824	0.204992
4	D1	FALSE	SH1-1	ACTB	UNKNOWN	SYBR	None	16.0321	16.1297	0.0958911
5	E1	FALSE	SH1-2	ACTB	UNKNOWN	SYBR	None	17.478	17.6186	0.126832
6	F1	FALSE	SH1-3	ACTB	UNKNOWN	SYBR	None	17.2682	17.2604	0.395471
7	G1	FALSE	SH2-1	ACTB	UNKNOWN	SYBR	None	17.8045	17.9109	0.105969
8	H1	FALSE	SH2-2	ACTB	UNKNOWN	SYBR	None	17.0001	17.1024	0.14371
9	A2	FALSE	NC-1	ACTB	UNKNOWN	SYBR	None	17.2349	17.1569	0.213074
10	B2	FALSE	NC-2	ACTB	UNKNOWN	SYBR	None	18.6852	18.7483	0.102679
11	C2	FALSE	NC-3	ACTB	UNKNOWN	SYBR	None	17.3925	17.5824	0.204992
12	D2	FALSE	SH1-1	ACTB	UNKNOWN	SYBR	None	16.2237	16.1297	0.0958911
13	E2	FALSE	SH1-2	ACTB	UNKNOWN	SYBR	None	17.6537	17.6186	0.126832
14	F2	FALSE	SH1-3	ACTB	UNKNOWN	SYBR	None	16.8612	17.2604	0.395471
15	G2	FALSE	SH2-1	ACTB	UNKNOWN	SYBR	None	18.0164	17.9109	0.105969
16	H2	FALSE	SH2-2	ACTB	UNKNOWN	SYBR	None	17.0405	17.1024	0.14371
17	A3	FALSE	NC-1	ACTB	UNKNOWN	SYBR	None	17.3201	17.1569	0.213074
18	B3	FALSE	NC-2	ACTB	UNKNOWN	SYBR	None	18.8668	18.7483	0.102679
19	C3	FALSE	NC-3	ACTB	UNKNOWN	SYBR	None	17.7997	17.5824	0.204992
20	D3	FALSE	SH1-1	ACTB	UNKNOWN	SYBR	None	16.1335	16.1297	0.0958911
21	E3	FALSE	SH1-2	ACTB	UNKNOWN	SYBR	None	17.7243	17.6186	0.126832
22	F3	FALSE	SH1-3	ACTB	UNKNOWN	SYBR	None	17.652	17.2604	0.395471
23	G3	FALSE	SH2-1	ACTB	UNKNOWN	SYBR	None	17.9118	17.9109	0.105969
24	H3	FALSE	SH2-2	ACTB	UNKNOWN	SYBR	None	17.2667	17.1024	0.14371
25	A4	FALSE	NC-1	HNF4A	UNKNOWN	SYBR	None	25.2571	25.2154	0.479629	8.05846
26	B4	FALSE	NC-2	HNF4A	UNKNOWN	SYBR	None	27.7732	26.7604	0.890386	8.01209
27	C4	FALSE	NC-3	HNF4A	UNKNOWN	SYBR	None	25.947	25.6557	0.256159	8.07329
28	D4	FALSE	SH1-1	HNF4A	UNKNOWN	SYBR	None	25.4141	25.3419	0.127826	9.21219
29	E4	FALSE	SH1-2	HNF4A	UNKNOWN	SYBR	None	27.2732	26.7753	0.495503	9.15663
30	F4	FALSE	SH1-3	HNF4A	UNKNOWN	SYBR	None	26.0597	26.5101	0.473497	9.24962
31	G4	FALSE	SH2-1	HNF4A	UNKNOWN	SYBR	None	26.7903	27.1953	0.369351	9.28439
32	H4	FALSE	SH2-2	HNF4A	UNKNOWN	SYBR	None	26.1257	26.1936	0.743152	9.09113
33	A5	FALSE	NC-1	HNF4A	UNKNOWN	SYBR	None	25.6728	25.2154	0.479629	8.05846
34	B5	FALSE	NC-2	HNF4A	UNKNOWN	SYBR	None	26.1009	26.7604	0.890386	8.01209
35	C5	FALSE	NC-3	HNF4A	UNKNOWN	SYBR	None	25.5543	25.6557	0.256159	8.07329
36	D5	FALSE	SH1-1	HNF4A	UNKNOWN	SYBR	None	25.4174	25.3419	0.127826	9.21219
37	E5	FALSE	SH1-2	HNF4A	UNKNOWN	SYBR	None	26.2822	26.7753	0.495503	9.15663
38	F5	FALSE	SH1-3	HNF4A	UNKNOWN	SYBR	None	27.0037	26.5101	0.473497	9.24962
39	G5	FALSE	SH2-1	HNF4A	UNKNOWN	SYBR	None	27.282	27.1953	0.369351	9.28439
40	H5	FALSE	SH2-2	HNF4A	UNKNOWN	SYBR	None	26.9683	26.1936	0.743152	9.09113
41	A6	FALSE	NC-1	HNF4A	UNKNOWN	SYBR	None	24.7163	25.2154	0.479629	8.05846
42	B6	FALSE	NC-2	HNF4A	UNKNOWN	SYBR	None	26.407	26.7604	0.890386	8.01209
43	C6	FALSE	NC-3	HNF4A	UNKNOWN	SYBR	None	25.4657	25.6557	0.256159	8.07329
44	D6	FALSE	SH1-1	HNF4A	UNKNOWN	SYBR	None	25.1944	25.3419	0.127826	9.21219
45	E6	FALSE	SH1-2	HNF4A	UNKNOWN	SYBR	None	26.7705	26.7753	0.495503	9.15663
46	F6	FALSE	SH1-3	HNF4A	UNKNOWN	SYBR	None	26.4669	26.5101	0.473497	9.24962
47	G6	FALSE	SH2-1	HNF4A	UNKNOWN	SYBR	None	27.5136	27.1953	0.369351	9.28439
48	H6	FALSE	SH2-2	HNF4A	UNKNOWN	SYBR	None	25.4867	26.1936	0.743152	9.09113
49	A7	FALSE	NC-1	POR	UNKNOWN	SYBR	None	24.4965	24.0739	0.41561	6.91692
50	B7	FALSE	NC-2	POR	UNKNOWN	SYBR	None	25.7848	25.4921	0.347954	6.74383
51	C7	FALSE	NC-3	POR	UNKNOWN	SYBR	None	24.3458	24.2838	0.467646	6.70146
52	D7	FALSE	SH1-1	POR	UNKNOWN	SYBR	None	23.8391	24.107	0.294597	7.97729
53	E7	FALSE	SH1-2	POR	UNKNOWN	SYBR	None	25.3749	25.571	0.252481	7.95235
54	F7	FALSE	SH1-3	POR	UNKNOWN	SYBR	None	24.8327	24.975	0.124056	7.71454
55	G7	FALSE	SH2-1	POR	UNKNOWN	SYBR	None	25.5021	25.5652	0.185126	7.65426
56	H7	FALSE	SH2-2	POR	UNKNOWN	SYBR	None	25.0132	24.7215	0.260386	7.61906
57	A8	FALSE	NC-1	POR	UNKNOWN	SYBR	None	23.6657	24.0739	0.41561	6.91692
58	B8	FALSE	NC-2	POR	UNKNOWN	SYBR	None	25.5841	25.4921	0.347954	6.74383
59	C8	FALSE	NC-3	POR	UNKNOWN	SYBR	None	23.7883	24.2838	0.467646	6.70146
60	D8	FALSE	SH1-1	POR	UNKNOWN	SYBR	None	24.0595	24.107	0.294597	7.97729
61	E8	FALSE	SH1-2	POR	UNKNOWN	SYBR	None	25.4822	25.571	0.252481	7.95235
62	F8	FALSE	SH1-3	POR	UNKNOWN	SYBR	None	25.0321	24.975	0.124056	7.71454
63	G8	FALSE	SH2-1	POR	UNKNOWN	SYBR	None	25.4198	25.5652	0.185126	7.65426
64	H8	FALSE	SH2-2	POR	UNKNOWN	SYBR	None	24.6386	24.7215	0.260386	7.61906
65	A9	FALSE	NC-1	POR	UNKNOWN	SYBR	None	24.0593	24.0739	0.41561	6.91692
66	B9	FALSE	NC-2	POR	UNKNOWN	SYBR	None	25.1074	25.4921	0.347954	6.74383
67	C9	FALSE	NC-3	POR	UNKNOWN	SYBR	None	24.7174	24.2838	0.467646	6.70146
68	D9	FALSE	SH1-1	POR	UNKNOWN	SYBR	None	24.4225	24.107	0.294597	7.97729
69	E9	FALSE	SH1-2	POR	UNKNOWN	SYBR	None	25.8559	25.571	0.252481	7.95235
70	F9	FALSE	SH1-3	POR	UNKNOWN	SYBR	None	25.0602	24.975	0.124056	7.71454
71	G9	FALSE	SH2-1	POR	UNKNOWN	SYBR	None	25.7736	25.5652	0.185126	7.65426
72	H9	FALSE	SH2-2	POR	UNKNOWN	SYBR	None	24.5126	24.7215	0.260386	7.61906
73	A10	FALSE	SH2-3	ACTB	UNKNOWN	SYBR	None	17.3009	17.3643	0.219377
74	B10	FALSE	SH2-3	HNF4A	UNKNOWN	SYBR	None	26.8869	26.8774	0.0158386	9.51302
75	C10	FALSE	SH2-3	POR	UNKNOWN	SYBR	None	25.3191	25.3305	0.423388	7.96614
76	A11	FALSE	SH2-3	ACTB	UNKNOWN	SYBR	None	17.1837	17.3643	0.219377
77	B11	FALSE	SH2-3	HNF4A	UNKNOWN	SYBR	None	26.8591	26.8774	0.0158386	9.51302
78	C11	FALSE	SH2-3	POR	UNKNOWN	SYBR	None	24.9129	25.3305	0.423388	7.96614
79	A12	FALSE	SH2-3	ACTB	UNKNOWN	SYBR	None	17.6085	17.3643	0.219377
80	B12	FALSE	SH2-3	HNF4A	UNKNOWN	SYBR	None	26.8861	26.8774	0.0158386	9.51302
81	C12	FALSE	SH2-3	POR	UNKNOWN	SYBR	None	25.7594	25.3305	0.423388	7.96614

## Sheet: Figure 2B-H23
Well	Well Position	Omit	Sample Name	Target Name	Task	Reporter	Quencher	CT	Ct Mean	Ct SD	Delta Ct Mean
1	A1	FALSE	NC-1	ACTB	UNKNOWN	SYBR	None	17.8423	17.8466	0.209828
2	B1	FALSE	NC-2	ACTB	UNKNOWN	SYBR	None	17.56	16.7528	0.737561
3	C1	FALSE	NC-3	ACTB	UNKNOWN	SYBR	None	17.0747	17.171	0.190895
4	D1	FALSE	OE-1	ACTB	UNKNOWN	SYBR	None	15.1067	16.3503	1.35231
5	E1	FALSE	OE-2	ACTB	UNKNOWN	SYBR	None	17.2686	17.5066	0.206109
6	F1	FALSE	OE-3	ACTB	UNKNOWN	SYBR	None	17.3834	17.3324	1.30387
7	A2	FALSE	NC-1	ACTB	UNKNOWN	SYBR	None	17.639	17.8466	0.209828
8	B2	FALSE	NC-2	ACTB	UNKNOWN	SYBR	None	16.1141	16.7528	0.737561
9	C2	FALSE	NC-3	ACTB	UNKNOWN	SYBR	None	17.0475	17.171	0.190895
10	D2	FALSE	OE-1	ACTB	UNKNOWN	SYBR	None	16.1543	16.3503	1.35231
11	E2	FALSE	OE-2	ACTB	UNKNOWN	SYBR	None	17.625	17.5066	0.206109
12	F2	FALSE	OE-3	ACTB	UNKNOWN	SYBR	None	16.0037	17.3324	1.30387
13	A3	FALSE	NC-1	ACTB	UNKNOWN	SYBR	None	18.0586	17.8466	0.209828
14	B3	FALSE	NC-2	ACTB	UNKNOWN	SYBR	None	16.5843	16.7528	0.737561
15	C3	FALSE	NC-3	ACTB	UNKNOWN	SYBR	None	17.3909	17.171	0.190895
16	D3	FALSE	OE-1	ACTB	UNKNOWN	SYBR	None	17.7899	16.3503	1.35231
17	E3	FALSE	OE-2	ACTB	UNKNOWN	SYBR	None	17.6262	17.5066	0.206109
18	F3	FALSE	OE-3	ACTB	UNKNOWN	SYBR	None	18.6099	17.3324	1.30387
19	A4	FALSE	NC-1	HNF4A	UNKNOWN	SYBR	None	30.5423	30.6885	0.378896	12.8419
20	B4	FALSE	NC-2	HNF4A	UNKNOWN	SYBR	None	30.4015	30.1813	0.955985	13.4285
21	C4	FALSE	NC-3	HNF4A	UNKNOWN	SYBR	None	31.303	30.6868	0.676992	13.5158
22	D4	FALSE	OE-1	HNF4A	UNKNOWN	SYBR	None	26.6929	26.0864	0.525252	9.73613
23	E4	FALSE	OE-2	HNF4A	UNKNOWN	SYBR	None	26.8667	26.8076	0.383629	9.30102
24	F4	FALSE	OE-3	HNF4A	UNKNOWN	SYBR	None	25.9619	26.2648	0.681967	8.93241
25	A5	FALSE	NC-1	HNF4A	UNKNOWN	SYBR	None	31.1187	30.6885	0.378896	12.8419
26	B5	FALSE	NC-2	HNF4A	UNKNOWN	SYBR	None	31.0079	30.1813	0.955985	13.4285
27	C5	FALSE	NC-3	HNF4A	UNKNOWN	SYBR	None	30.7954	30.6868	0.676992	13.5158
28	D5	FALSE	OE-1	HNF4A	UNKNOWN	SYBR	None	25.7824	26.0864	0.525252	9.73613
29	E5	FALSE	OE-2	HNF4A	UNKNOWN	SYBR	None	26.3979	26.8076	0.383629	9.30102
30	F5	FALSE	OE-3	HNF4A	UNKNOWN	SYBR	None	25.7867	26.2648	0.681967	8.93241
31	A6	FALSE	NC-1	HNF4A	UNKNOWN	SYBR	None	30.4045	30.6885	0.378896	12.8419
32	B6	FALSE	NC-2	HNF4A	UNKNOWN	SYBR	None	29.1344	30.1813	0.955985	13.4285
33	C6	FALSE	NC-3	HNF4A	UNKNOWN	SYBR	None	29.9621	30.6868	0.676992	13.5158
34	D6	FALSE	OE-1	HNF4A	UNKNOWN	SYBR	None	25.784	26.0864	0.525252	9.73613
35	E6	FALSE	OE-2	HNF4A	UNKNOWN	SYBR	None	27.1583	26.8076	0.383629	9.30102
36	F6	FALSE	OE-3	HNF4A	UNKNOWN	SYBR	None	27.0457	26.2648	0.681967	8.93241
37	A7	FALSE	NC-1	POR	UNKNOWN	SYBR	None	25.8689	26.08	0.186603	8.23332
38	B7	FALSE	NC-2	POR	UNKNOWN	SYBR	None	25.0345	24.9271	0.555975	8.17426
39	C7	FALSE	NC-3	POR	UNKNOWN	SYBR	None	25.2299	25.6523	0.365787	8.48128
40	D7	FALSE	OE-1	POR	UNKNOWN	SYBR	None	23.5749	23.8939	0.325443	7.5436
41	E7	FALSE	OE-2	POR	UNKNOWN	SYBR	None	25.0202	25.3489	0.295942	7.84232
42	F7	FALSE	OE-3	POR	UNKNOWN	SYBR	None	26.1508	24.8932	1.35259	7.56085
43	A8	FALSE	NC-1	POR	UNKNOWN	SYBR	None	26.1479	26.08	0.186603	8.23332
44	B8	FALSE	NC-2	POR	UNKNOWN	SYBR	None	25.4214	24.9271	0.555975	8.17426
45	C8	FALSE	NC-3	POR	UNKNOWN	SYBR	None	25.8618	25.6523	0.365787	8.48128
46	D8	FALSE	OE-1	POR	UNKNOWN	SYBR	None	24.2254	23.8939	0.325443	7.5436
47	E8	FALSE	OE-2	POR	UNKNOWN	SYBR	None	25.4326	25.3489	0.295942	7.84232
48	F8	FALSE	OE-3	POR	UNKNOWN	SYBR	None	25.0665	24.8932	1.35259	7.56085
49	A9	FALSE	NC-1	POR	UNKNOWN	SYBR	None	26.223	26.08	0.186603	8.23332
50	B9	FALSE	NC-2	POR	UNKNOWN	SYBR	None	24.3252	24.9271	0.555975	8.17426
51	C9	FALSE	NC-3	POR	UNKNOWN	SYBR	None	25.8652	25.6523	0.365787	8.48128
52	D9	FALSE	OE-1	POR	UNKNOWN	SYBR	None	23.8814	23.8939	0.325443	7.5436
53	E9	FALSE	OE-2	POR	UNKNOWN	SYBR	None	25.594	25.3489	0.295942	7.84232
54	F9	FALSE	OE-3	POR	UNKNOWN	SYBR	None	23.4623	24.8932	1.35259	7.56085
