# Supplementary material for: Hepatic nuclear factor 4 alpha promotes the ferroptosis of lung adenocarcinoma via transcriptional activation of cytochrome P450 oxidoreductase
Source: PeerJ. 2023 May 8;11:e15377. doi: 10.7717/peerj.15377 (PMC10174064; doi:10.7717/peerj.15377)
Supplement: Supplemental Information 7 [file peerj-11-15377-s007.xlsx]

## Sheet: Figure 2D-A549
HNF4A-NC	RSL3 (uM)						percentages
	0	6436.47	6778.68	6242.49	6498.19	6577.23		0.988255	1.04556	0.955772	0.99859	1.01183
	1	5916.24	5718.6	5489.15	5478.22	5684.53		0.901142	0.868046	0.829624	0.827793	0.862341
	2	4385.21	4189.63	4589.6	4141.69	4160.25		0.644767	0.612017	0.678992	0.60399	0.607097
	5	2345.03	2273.59	2360.24	2749.66	2564.92		0.303135	0.291173	0.305681	0.370891	0.339957
	10	1553	1270.09	1257.14	1639.11	1649.72		0.170509	0.123134	0.120967	0.184928	0.186705
	Blank	534.746	534.746	534.746	534.746	534.746
HNF4A-SH1	RSL3 (uM)						percentages
	0	5934.35	5954.68	5933.56	5882.66	5985.2		0.999311	1.00306	0.999166	0.989784	1.00868
	1	5404.44	5395.94	5280.04	5302.22	5643.44		0.901657	0.900089	0.878731	0.882818	0.945699
	2	4478.66	4388.34	4593.56	4800.44	4857.65		0.731048	0.714403	0.752223	0.790347	0.800891
	5	3413.22	3438.65	3482.5	3379.24	3503.43		0.534703	0.53939	0.54747	0.528441	0.551326
	10	1997.15	1873.48	1942.95	2236.14	1967.51		0.273742	0.250952	0.263754	0.317784	0.268279
	Blank	483.003	522.988	504.878	524.137	523.634
HNF4A-SH2	RSL3 (uM)						percentages
	0	6163.17	6206.84	6527.62	6794.75	7377.47		0.926232	0.933378	0.98587	1.02958	1.12494
	1	6361.36	6411.73	6549.72	5706.75	5904.52		0.958664	0.966905	0.989486	0.851543	0.883907
	2	5785	5349.26	5725.85	5151.15	5698.03		0.864348	0.793045	0.854669	0.760625	0.850117
	5	3928.01	4350.22	3545.12	4003.72	3935.86		0.560473	0.629563	0.497817	0.572862	0.561758
	10	1835.16	1806.05	1838.69	2271.83	2098.27		0.218002	0.213237	0.218579	0.289457	0.261056
	Blank	482.889	517.76	524.441	495.981	493.686
HNF4A-NC	IKE (uM)						percentages
	0	6679.05	6160.61	6544.76	6131.17	6343.81		1.05236	0.963985	1.02947	0.958967	0.995215
	2	4973.68	5061.42	5441.58	4966.12	4952.62		0.761652	0.776609	0.841414	0.760363	0.758062
	5	3434.62	3329.63	3895.89	3390.35	3184.17		0.499293	0.481397	0.577925	0.491747	0.456601
	10	2956.28	3660.14	3632.1	2772.75	2610.19		0.417753	0.537739	0.532958	0.386467	0.358756
	20	2906.33	2495.71	3249.41	2952.21	2265.71		0.409238	0.339241	0.467721	0.417058	0.300033
	Blank	521.164	491.845	497.777	524.741	492.685
HNF4A-SH1	IKE (uM)						percentages
	0	6409.25	5980.6	6376.25	5565.03	6078.2		1.0587	0.981841	1.05279	0.907324	0.999343
	2	5102.1	5155.51	5005.54	5204.51	4689.21		0.824315	0.833891	0.806999	0.842677	0.750277
	5	3861.41	4021.65	4478.76	4619.77	4069.31		0.601841	0.630575	0.712541	0.737825	0.639121
	10	4239.99	4296.61	3894.44	3976.38	3471.2		0.669727	0.67988	0.607764	0.622457	0.531872
	20	3434.51	4015.63	3881.74	3756.09	4043.68		0.525292	0.629496	0.605488	0.582957	0.634525
	Blank	504.962	491.829	494.366	513.903	520.178
HNF4A-SH2	IKE (uM)						percentages
	0	6241.19	6317.45	5842.77	5436.48	6051.37		1.04808	1.062	0.975338	0.901165	1.01342
	2	5613.66	5341.16	5305.03	5448.97	4784.18		0.933512	0.883762	0.877166	0.903444	0.782076
	5	4078.92	4494.48	4799.32	4693.46	4001.46		0.653321	0.729188	0.784841	0.765514	0.63918
	10	4356.89	4148.3	4439.76	3530.3	4517.09		0.704069	0.665988	0.719197	0.553163	0.733316
	20	3649.3	3396.88	4236.31	4198	3905.09		0.574888	0.528803	0.682056	0.675061	0.621587
	Blank	495.661	519.547	490.673	487.255	508.662

## Sheet: Figure 2D-H23
HNF4A-NC	RSL3 (uM)						percentages
	0	3245.73	3755.21	3738.82	3648.15	3577		0.888917	1.05189	1.04665	1.01765	0.994887
	1	3457.47	3358.34	2940.65	3264.1	2941.6		0.956652	0.924938	0.791322	0.894793	0.791628
	2	3001.17	2654.59	2874.72	2861.83	2430.45		0.810684	0.699814	0.770233	0.766109	0.628112
	5	2186.57	1795.24	1955.04	1883.73	2284.64		0.550099	0.424916	0.476032	0.453221	0.581471
	10	1385.29	1473.86	1614.47	1844.25	1426.4		0.293774	0.322108	0.367087	0.440593	0.306926
	Blank	480.15	484.164	446.532	473.215	450.637
HNF4A-OE	RSL3 (uM)						percentages
	0	3972.57	3782.33	3643.62	4018.26	3660.97		1.04685	0.990088	0.948698	1.06049	0.953873
	1	3032.24	3424.55	3175.68	3555.93	3410.95		0.766266	0.883329	0.809068	0.922533	0.879271
	2	2642.98	2681.2	2306.54	2216.58	2300.36		0.650113	0.661519	0.549721	0.522878	0.547876
	5	1352.24	1522.29	1427.36	1308.65	1443.38		0.264965	0.315706	0.287379	0.251958	0.29216
	10	967.961	1177.36	1077.54	864.155	915.691		0.150298	0.21278	0.182994	0.119323	0.134701
	Blank	463.686	456.889	451.132	469.372	480.274
HNF4A-NC	IKE (uM)
	0	4019.3	4168.65	3748.4	3773.24	4038.77		1.02022	1.06359	0.941556	0.948769	1.02587
	2	3172.59	3290.9	2664.07	3019.36	2887.31		0.774358	0.80871	0.626699	0.729864	0.69152
	5	2171.13	1839.09	2315.63	2195.88	2204.31		0.483562	0.387147	0.525522	0.490749	0.493196
	10	1696.42	1709.19	1628.72	1840.57	1539.82		0.34572	0.349427	0.326062	0.387577	0.300249
	20	1265.86	1396.94	1144.49	1284.64	1564.19		0.220699	0.258761	0.185457	0.226151	0.307326
	Blank	501.282	496.483	506.533	501.906	522.815
HNF4A-OE	IKE (uM)
	0	3245.73	3755.21	3738.82	3648.15	3577		0.888917	1.05189	1.04665	1.01765	0.994887
	2	3457.47	3358.34	2940.65	3264.1	2941.6		0.956652	0.924938	0.791322	0.894793	0.791628
	5	3001.17	2654.59	2874.72	2861.83	2430.45		0.810684	0.699814	0.770233	0.766109	0.628112
	10	2186.57	1795.24	1955.04	1883.73	2284.64		0.550099	0.424916	0.476032	0.453221	0.581471
	20	1385.29	1473.86	1614.47	1844.25	1426.4		0.293774	0.322108	0.367087	0.440593	0.306926
	Blank	480.15	484.164	446.532	473.215	450.637
