# Supplementary material for: Hepatic nuclear factor 4 alpha promotes the ferroptosis of lung adenocarcinoma via transcriptional activation of cytochrome P450 oxidoreductase
Source: PeerJ. 2023 May 8;11:e15377. doi: 10.7717/peerj.15377 (PMC10174064; doi:10.7717/peerj.15377)
Supplement: Supplemental Information 9 [file peerj-11-15377-s009.xlsx]

## Sheet: Sheet1
Well	Well Position	Omit	Sample Name	Target Name	Task	Reporter	Quencher	CT	Ct Mean	Ct SD	Delta Ct Mean
1	A1	FALSE	A-Input-1	POR	UNKNOWN	SYBR	None	25.629	27.9478	2.75036
2	B1	FALSE	A-IgG-1	POR	UNKNOWN	SYBR	None	30.9865	28.0487	2.62543	0.100937
3	C1	FALSE	A-HNF4A-1	POR	UNKNOWN	SYBR	None	27.2278	27.6649	1.988	-0.282875
4	D1	FALSE	P-Input-1	POR	UNKNOWN	SYBR	None	25.9318	27.7189	1.97232	-0.228857
5	E1	FALSE	P-IgG-1	POR	UNKNOWN	SYBR	None	29.8351	27.4502	2.35526	-0.49756
6	F1	FALSE	P-HNF4A-1	POR	UNKNOWN	SYBR	None	27.3899	27.8739	3.01939	-0.0739087
7	A2	FALSE	A-Input-1	POR	UNKNOWN	SYBR	None	25.1257	27.8739	3.01939
8	B2	FALSE	A-IgG-1	POR	UNKNOWN	SYBR	None	31.106	27.539	3.15266	-0.408751
9	C2	FALSE	A-HNF4A-1	POR	UNKNOWN	SYBR	None	26.3853	27.4692	3.23417	-0.478627
10	D2	FALSE	P-Input-1	POR	UNKNOWN	SYBR	None	24.9161	27.044	2.52251	-0.903823
11	E2	FALSE	P-IgG-1	POR	UNKNOWN	SYBR	None	29.8304	27.2197	2.47152	-0.728033
12	F2	FALSE	P-HNF4A-1	POR	UNKNOWN	SYBR	None	26.9127	27.4861	2.11675	-0.461703
13	A3	FALSE	A-Input-1	POR	UNKNOWN	SYBR	None	25.7151	27.4861	2.11675
14	B3	FALSE	A-IgG-1	POR	UNKNOWN	SYBR	None	29.9362	27.5213	2.1754	-0.426437
15	C3	FALSE	A-HNF4A-1	POR	UNKNOWN	SYBR	None	26.9147	27.522	2.17512	-0.425766
16	D3	FALSE	P-Input-1	POR	UNKNOWN	SYBR	None	25.4641	27.4384	2.2816	-0.50943
17	E3	FALSE	P-IgG-1	POR	UNKNOWN	SYBR	None	30.0155	27.4648	2.32501	-0.483023
18	F3	FALSE	P-HNF4A-1	POR	UNKNOWN	SYBR	None	27.6197	27.6997	2.27674	-0.248045
19	A4	FALSE	A-Input-2	POR	UNKNOWN	SYBR	None	25.5662	27.945	3.46663	-0.00275573
20	B4	FALSE	A-IgG-2	POR	UNKNOWN	SYBR	None	31.9225	27.8391	3.57872	-0.108697
21	C4	FALSE	A-HNF4A-2	POR	UNKNOWN	SYBR	None	26.3464	27.0906	2.30629	-0.857153
22	D4	FALSE	P-Input-2	POR	UNKNOWN	SYBR	None	25.2483	27.3613	2.22136	-0.586493
23	E4	FALSE	P-IgG-2	POR	UNKNOWN	SYBR	None	29.6771	27.2201	2.4268	-0.727697
24	F4	FALSE	P-HNF4A-2	POR	UNKNOWN	SYBR	None	27.1584	27.8012	3.34458	-0.146556
25	A5	FALSE	A-Input-2	POR	UNKNOWN	SYBR	None	24.8247	27.8012	3.34458	-0.146556
26	B5	FALSE	A-IgG-2	POR	UNKNOWN	SYBR	None	31.4206	27.6267	3.40795	-0.321064
27	C5	FALSE	A-HNF4A-2	POR	UNKNOWN	SYBR	None	26.6349	27.588	3.456	-0.359762
28	D5	FALSE	P-Input-2	POR	UNKNOWN	SYBR	None	24.7086	28.3118	4.6731	0.364055
29	E5	FALSE	P-IgG-2	POR	UNKNOWN	SYBR	None	33.592	28.5169	4.57517	0.569161
30	F5	FALSE	P-HNF4A-2	POR	UNKNOWN	SYBR	None	27.2502	28.7302	4.31654	0.782385
31	A6	FALSE	A-Input-2	POR	UNKNOWN	SYBR	None	25.3483	28.7302	4.31654	0.782385
32	B6	FALSE	A-IgG-2	POR	UNKNOWN	SYBR	None	31.4862	28.0282	3.14203	0.0804333
33	C6	FALSE	A-HNF4A-2	POR	UNKNOWN	SYBR	None	26.9243	27.9196	3.18767	-0.0281879
34	D6	FALSE	P-Input-2	POR	UNKNOWN	SYBR	None	24.7191	27.7098	3.45126	-0.237934
35	E6	FALSE	P-IgG-2	POR	UNKNOWN	SYBR	None	30.5003	27.3812	2.91758	-0.566552
36	F6	FALSE	P-HNF4A-2	POR	UNKNOWN	SYBR	None	27.0781	27.4325	2.90687	-0.515296
37	A7	FALSE	A-Input-3	POR	UNKNOWN	SYBR	None	26.0176	27.7574	1.71187	-0.190375
38	B7	FALSE	A-IgG-3	POR	UNKNOWN	SYBR	None	29.4399	27.5586	2.02158	-0.38919
39	C7	FALSE	A-HNF4A-3	POR	UNKNOWN	SYBR	None	27.8147	28.204	2.99655	0.25624
40	D7	FALSE	P-Input-3	POR	UNKNOWN	SYBR	None	25.4212	27.9988	3.05702	0.0509939
41	E7	FALSE	P-IgG-3	POR	UNKNOWN	SYBR	None	31.3762	28.116	2.91212	0.168173
42	F7	FALSE	P-HNF4A-3	POR	UNKNOWN	SYBR	None	27.199	28.1532	2.97466	0.205392
43	A8	FALSE	A-Input-3	POR	UNKNOWN	SYBR	None	25.7727	28.1532	2.97466	0.205392
44	B8	FALSE	A-IgG-3	POR	UNKNOWN	SYBR	None	31.4878	28.1731	2.96528	0.225271
45	C8	FALSE	A-HNF4A-3	POR	UNKNOWN	SYBR	None	27.2586	27.87	3.35422	-0.0777908
46	D8	FALSE	P-Input-3	POR	UNKNOWN	SYBR	None	24.8635	28.199	3.8919	0.251248
47	E8	FALSE	P-IgG-3	POR	UNKNOWN	SYBR	None	32.475	28.1207	3.92255	0.172877
48	F8	FALSE	P-HNF4A-3	POR	UNKNOWN	SYBR	None	27.0235	28.3054	3.69916	0.357592
49	A9	FALSE	A-Input-3	POR	UNKNOWN	SYBR	None	25.4177	28.3054	3.69916	0.357592
50	B9	FALSE	A-IgG-3	POR	UNKNOWN	SYBR	None	30.0383	27.4932	2.34588	-0.454615
51	C9	FALSE	A-HNF4A-3	POR	UNKNOWN	SYBR	None	27.6425	27.6995	2.31087	-0.248276
52	D9	FALSE	P-Input-3	POR	UNKNOWN	SYBR	None	24.8362	27.5057	2.60375	-0.442079
53	E9	FALSE	P-IgG-3	POR	UNKNOWN	SYBR	None	33.3224	28.6004	4.3234	0.652601
54	F9	FALSE	P-HNF4A-3	POR	UNKNOWN	SYBR	None	27.1493	28.436	4.38694	0.488201
