# Supplementary material for: Hepatic nuclear factor 4 alpha promotes the ferroptosis of lung adenocarcinoma via transcriptional activation of cytochrome P450 oxidoreductase
Source: PeerJ. 2023 May 8;11:e15377. doi: 10.7717/peerj.15377 (PMC10174064; doi:10.7717/peerj.15377)
Supplement: Supplemental Information 10 [file peerj-11-15377-s010.xlsx]

## Sheet: Figure 3E
POR promoter
	Firefly-1	Firefly-2	Firefly-3	Firefly-4			Renilla-1	Renilla-2	Renilla-3	Renilla-4			Firefly/Renilla-1	Firefly/Renilla-2	Firefly/Renilla-3	Firefly/Renilla-4			Average	Fold-change
NC-1	5880.5	5462.77	5416.82	5287.79		NC 1-1	2568.03	2566.78	2521.74	2348.15		NC-1	2.28989	2.12826	2.14805	2.2519		NC-1	2.20452	0.929986
NC-2	5925.01	5656.21	6090.08	6010.19		NC 2-1	2589.83	2610.78	2620.22	2412.16		NC-2	2.2878	2.16648	2.32426	2.49162		NC-2	2.31754	0.977662
NC-3	5474.99	5853.11	5727.23	6004.23		NC 3-1	2230.66	2071.4	2266.27	2354.25		NC-3	2.45443	2.82567	2.52716	2.55038		NC-3	2.58941	1.09235
	Firefly-1	Firefly-2	Firefly-3	Firefly-4			Renilla-1	Renilla-2	Renilla-3	Renilla-4
OE-1	10121.8	9574.5	11442.6	11225.8		OE 1-1	2019.69	1950.1	1830.05	1889.99		OE-1	5.01156	4.90976	6.25264	5.9396		OE-1	5.52839	2.33217
OE-2	9037.25	10687.6	10328.5	10272.5		OE 2-1	1613.34	1537.56	1462.34	1538.11		OE-2	5.60157	6.95104	7.063	6.67862		OE-2	6.57356	2.77308
OE-3	11627.7	11465.4	12200.6	12502.2		OE 3-1	1786.87	1803.57	1725.58	1707.4		OE-3	6.50729	6.35707	7.07043	7.32238		OE-3	6.81429	2.87463
mutant POR promoter
	Firefly-1	Firefly-2	Firefly-3	Firefly-4			Renilla-1	Renilla-2	Renilla-3	Renilla-4			Firefly/Renilla-1	Firefly/Renilla-2	Firefly/Renilla-3	Firefly/Renilla-4			Average	Fold-change
NC-1	5392.09	5028.84	4806.18	4678.01		NC 1-1	2664.07	2484.7	2730.68	2741.28		NC-1	2.02401	2.02392	1.76006	1.70651		NC-1	1.87862	0.830871
NC-2	5193.67	5251.85	5804.36	5859.03		NC 2-1	3006.1	2927.53	2795.15	2740.13		NC-2	1.72771	1.79395	2.07659	2.13823		NC-2	1.93412	0.855416
NC-3	4945.79	5664.56	5398.48	5698.65		NC 3-1	2517.19	2577.21	2791.55	2684.36		NC-3	1.96481	2.19794	1.93386	2.12291		NC-3	2.05488	0.908825
	Firefly-1	Firefly-2	Firefly-3	Firefly-4			Renilla-1	Renilla-2	Renilla-3	Renilla-4
OE-1	5818.12	6243.19	6049.53	5607.44		OE 1-1	2810.27	2968.14	2780.1	2838.4		OE-1	2.07031	2.1034	2.17601	1.97556		OE-1	2.08132	0.920519
OE-2	5296.48	5319.74	5075.76	5197.31		OE 2-1	2459.59	2600.71	2709.95	2436.34		OE-2	2.1534	2.0455	1.87301	2.13324		OE-2	2.05129	0.907235
OE-3	5650.5	5519.47	5445.57	5437.89		OE 3-1	2595.66	2634.96	2900.93	2818.34		OE-3	2.1769	2.09471	1.87718	1.92947		OE-3	2.01956	0.893205
