# Supplementary material for: Hepatic nuclear factor 4 alpha promotes the ferroptosis of lung adenocarcinoma via transcriptional activation of cytochrome P450 oxidoreductase
Source: PeerJ. 2023 May 8;11:e15377. doi: 10.7717/peerj.15377 (PMC10174064; doi:10.7717/peerj.15377)
Supplement: Supplemental Information 11 [file peerj-11-15377-s011.xlsx]

## Sheet: Figure4A-A549
Well	Well Position	Omit	Sample Name	Target Name	Task	Reporter	Quencher	CT	Ct Mean	Ct SD	Delta Ct Mean
1	A1	FALSE	NC-1	ACTB	UNKNOWN	SYBR	None	17.8379	17.5544	0.388982
2	B1	FALSE	NC-2	ACTB	UNKNOWN	SYBR	None	19.07	19.0518	0.434507
3	C1	FALSE	NC-3	ACTB	UNKNOWN	SYBR	None	17.2535	17.4879	0.215809
4	D1	FALSE	SH1-1	ACTB	UNKNOWN	SYBR	None	17.2753	17.2031	0.442966
5	E1	FALSE	SH1-2	ACTB	UNKNOWN	SYBR	None	18.252	18.2275	0.104536
6	F1	FALSE	SH1-3	ACTB	UNKNOWN	SYBR	None	18.0448	18.1689	0.107552
7	G1	FALSE	SH2-1	ACTB	UNKNOWN	SYBR	None	17.6001	17.4042	0.298822
8	H1	FALSE	SH2-2	ACTB	UNKNOWN	SYBR	None	16.1154	16.9898	0.758882
9	I1	FALSE	SH2-3	ACTB	UNKNOWN	SYBR	None	17.0123	17.3618	0.382227
10	J1	FALSE	NCP-1	ACTB	UNKNOWN	SYBR	None	17.25	17.3795	0.323392
11	K1	FALSE	NCP-2	ACTB	UNKNOWN	SYBR	None	17.8787	17.6883	0.365267
12	L1	FALSE	NCP-3	ACTB	UNKNOWN	SYBR	None	18.9809	17.6876	1.13033
13	M1	FALSE	SH1P-1	ACTB	UNKNOWN	SYBR	None	16.2745	16.2345	0.279183
14	N1	FALSE	SH1P-2	ACTB	UNKNOWN	SYBR	None	17.4679	17.4334	0.163874
15	O1	FALSE	SH1P-3	ACTB	UNKNOWN	SYBR	None	18.4727	17.9362	0.646502
16	P1	FALSE	SH2P-1	ACTB	UNKNOWN	SYBR	None	17.7025	17.5693	0.402456
17	Q1	FALSE	SH2P-2	ACTB	UNKNOWN	SYBR	None	17.0963	17.1822	0.157637
18	R1	FALSE	SH2P-3	ACTB	UNKNOWN	SYBR	None	17.7642	17.8433	0.593659
19	A2	FALSE	NC-1	ACTB	UNKNOWN	SYBR	None	17.7143	17.5544	0.388982
20	B2	FALSE	NC-2	ACTB	UNKNOWN	SYBR	None	19.4769	19.0518	0.434507
21	C2	FALSE	NC-3	ACTB	UNKNOWN	SYBR	None	17.6783	17.4879	0.215809
22	D2	FALSE	SH1-1	ACTB	UNKNOWN	SYBR	None	17.6056	17.2031	0.442966
23	E2	FALSE	SH1-2	ACTB	UNKNOWN	SYBR	None	18.3176	18.2275	0.104536
24	F2	FALSE	SH1-3	ACTB	UNKNOWN	SYBR	None	18.234	18.1689	0.107552
25	G2	FALSE	SH2-1	ACTB	UNKNOWN	SYBR	None	17.0602	17.4042	0.298822
26	H2	FALSE	SH2-2	ACTB	UNKNOWN	SYBR	None	17.3767	16.9898	0.758882
27	I2	FALSE	SH2-3	ACTB	UNKNOWN	SYBR	None	17.7699	17.3618	0.382227
28	J2	FALSE	NCP-1	ACTB	UNKNOWN	SYBR	None	17.1409	17.3795	0.323392
29	K2	FALSE	NCP-2	ACTB	UNKNOWN	SYBR	None	17.919	17.6883	0.365267
30	L2	FALSE	NCP-3	ACTB	UNKNOWN	SYBR	None	17.193	17.6876	1.13033
31	M2	FALSE	SH1P-1	ACTB	UNKNOWN	SYBR	None	15.9375	16.2345	0.279183
32	N2	FALSE	SH1P-2	ACTB	UNKNOWN	SYBR	None	17.5773	17.4334	0.163874
33	O2	FALSE	SH1P-3	ACTB	UNKNOWN	SYBR	None	17.2184	17.9362	0.646502
34	P2	FALSE	SH2P-1	ACTB	UNKNOWN	SYBR	None	17.1171	17.5693	0.402456
35	Q2	FALSE	SH2P-2	ACTB	UNKNOWN	SYBR	None	17.0862	17.1822	0.157637
36	R2	FALSE	SH2P-3	ACTB	UNKNOWN	SYBR	None	17.2932	17.8433	0.593659
37	A3	FALSE	NC-1	ACTB	UNKNOWN	SYBR	None	17.1109	17.5544	0.388982
38	B3	FALSE	NC-2	ACTB	UNKNOWN	SYBR	None	18.6085	19.0518	0.434507
39	C3	FALSE	NC-3	ACTB	UNKNOWN	SYBR	None	17.532	17.4879	0.215809
40	D3	FALSE	SH1-1	ACTB	UNKNOWN	SYBR	None	16.7285	17.2031	0.442966
41	E3	FALSE	SH1-2	ACTB	UNKNOWN	SYBR	None	18.1128	18.2275	0.104536
42	F3	FALSE	SH1-3	ACTB	UNKNOWN	SYBR	None	18.228	18.1689	0.107552
43	G3	FALSE	SH2-1	ACTB	UNKNOWN	SYBR	None	17.5521	17.4042	0.298822
44	H3	FALSE	SH2-2	ACTB	UNKNOWN	SYBR	None	17.4772	16.9898	0.758882
45	I3	FALSE	SH2-3	ACTB	UNKNOWN	SYBR	None	17.3032	17.3618	0.382227
46	J3	FALSE	NCP-1	ACTB	UNKNOWN	SYBR	None	17.7476	17.3795	0.323392
47	K3	FALSE	NCP-2	ACTB	UNKNOWN	SYBR	None	17.2672	17.6883	0.365267
48	L3	FALSE	NCP-3	ACTB	UNKNOWN	SYBR	None	16.8888	17.6876	1.13033
49	M3	FALSE	SH1P-1	ACTB	UNKNOWN	SYBR	None	16.4915	16.2345	0.279183
50	N3	FALSE	SH1P-2	ACTB	UNKNOWN	SYBR	None	17.255	17.4334	0.163874
51	O3	FALSE	SH1P-3	ACTB	UNKNOWN	SYBR	None	18.1175	17.9362	0.646502
52	P3	FALSE	SH2P-1	ACTB	UNKNOWN	SYBR	None	17.8883	17.5693	0.402456
53	Q3	FALSE	SH2P-2	ACTB	UNKNOWN	SYBR	None	17.3642	17.1822	0.157637
54	R3	FALSE	SH2P-3	ACTB	UNKNOWN	SYBR	None	18.4726	17.8433	0.593659
55	A4	FALSE	NC-1	HNF4A	UNKNOWN	SYBR	None	25.9157	25.4194	0.451537	7.86498
56	B4	FALSE	NC-2	HNF4A	UNKNOWN	SYBR	None	27.198	27.0833	0.0994435	8.03151
57	C4	FALSE	NC-3	HNF4A	UNKNOWN	SYBR	None	25.4959	25.5496	0.289727	8.06172
58	D4	FALSE	SH1-1	HNF4A	UNKNOWN	SYBR	None	26.7575	26.4723	0.256498	9.26919
59	E4	FALSE	SH1-2	HNF4A	UNKNOWN	SYBR	None	27.0301	27.5164	0.463763	9.2889
60	F4	FALSE	SH1-3	HNF4A	UNKNOWN	SYBR	None	27.1869	27.6545	0.764525	9.48559
61	G4	FALSE	SH2-1	HNF4A	UNKNOWN	SYBR	None	26.3611	26.3503	0.219523	8.94618
62	H4	FALSE	SH2-2	HNF4A	UNKNOWN	SYBR	None	27.4555	26.5661	0.773998	9.5763
63	I4	FALSE	SH2-3	HNF4A	UNKNOWN	SYBR	None	26.6318	26.549	0.0915609	9.18724
64	J4	FALSE	NCP-1	HNF4A	UNKNOWN	SYBR	None	25.1247	25.3812	0.260061	8.00167
65	K4	FALSE	NCP-2	HNF4A	UNKNOWN	SYBR	None	26.2193	25.5643	0.577268	7.87602
66	L4	FALSE	NCP-3	HNF4A	UNKNOWN	SYBR	None	24.9796	25.1367	0.738118	7.44915
67	M4	FALSE	SH1P-1	HNF4A	UNKNOWN	SYBR	None	25.1111	24.9965	0.257506	8.76195
68	N4	FALSE	SH1P-2	HNF4A	UNKNOWN	SYBR	None	27.219	27.1768	0.201679	9.74339
69	O4	FALSE	SH1P-3	HNF4A	UNKNOWN	SYBR	None	26.1854	26.5922	0.616659	8.65594
70	P4	FALSE	SH2P-1	HNF4A	UNKNOWN	SYBR	None	27.8949	27.1722	0.785825	9.60286
71	Q4	FALSE	SH2P-2	HNF4A	UNKNOWN	SYBR	None	25.849	26.9511	0.986633	9.76887
72	R4	FALSE	SH2P-3	HNF4A	UNKNOWN	SYBR	None	26.4597	27.2332	0.721775	9.38993
73	A5	FALSE	NC-1	HNF4A	UNKNOWN	SYBR	None	25.3095	25.4194	0.451537	7.86498
74	B5	FALSE	NC-2	HNF4A	UNKNOWN	SYBR	None	27.0306	27.0833	0.0994435	8.03151
75	C5	FALSE	NC-3	HNF4A	UNKNOWN	SYBR	None	25.8625	25.5496	0.289727	8.06172
76	D5	FALSE	SH1-1	HNF4A	UNKNOWN	SYBR	None	26.399	26.4723	0.256498	9.26919
77	E5	FALSE	SH1-2	HNF4A	UNKNOWN	SYBR	None	27.9538	27.5164	0.463763	9.2889
78	F5	FALSE	SH1-3	HNF4A	UNKNOWN	SYBR	None	28.5368	27.6545	0.764525	9.48559
79	G5	FALSE	SH2-1	HNF4A	UNKNOWN	SYBR	None	26.5643	26.3503	0.219523	8.94618
80	H5	FALSE	SH2-2	HNF4A	UNKNOWN	SYBR	None	26.1972	26.5661	0.773998	9.5763
81	I5	FALSE	SH2-3	HNF4A	UNKNOWN	SYBR	None	26.4507	26.549	0.0915609	9.18724
82	J5	FALSE	NCP-1	HNF4A	UNKNOWN	SYBR	None	25.3743	25.3812	0.260061	8.00167
83	K5	FALSE	NCP-2	HNF4A	UNKNOWN	SYBR	None	25.344	25.5643	0.577268	7.87602
84	L5	FALSE	NCP-3	HNF4A	UNKNOWN	SYBR	None	24.4898	25.1367	0.738118	7.44915
85	M5	FALSE	SH1P-1	HNF4A	UNKNOWN	SYBR	None	25.1767	24.9965	0.257506	8.76195
86	N5	FALSE	SH1P-2	HNF4A	UNKNOWN	SYBR	None	26.9573	27.1768	0.201679	9.74339
87	O5	FALSE	SH1P-3	HNF4A	UNKNOWN	SYBR	None	27.3017	26.5922	0.616659	8.65594
88	P5	FALSE	SH2P-1	HNF4A	UNKNOWN	SYBR	None	27.2859	27.1722	0.785825	9.60286
89	Q5	FALSE	SH2P-2	HNF4A	UNKNOWN	SYBR	None	27.7521	26.9511	0.986633	9.76887
90	R5	FALSE	SH2P-3	HNF4A	UNKNOWN	SYBR	None	27.3514	27.2332	0.721775	9.38993
91	A6	FALSE	NC-1	HNF4A	UNKNOWN	SYBR	None	25.0329	25.4194	0.451537	7.86498
92	B6	FALSE	NC-2	HNF4A	UNKNOWN	SYBR	None	27.0213	27.0833	0.0994435	8.03151
93	C6	FALSE	NC-3	HNF4A	UNKNOWN	SYBR	None	25.2906	25.5496	0.289727	8.06172
94	D6	FALSE	SH1-1	HNF4A	UNKNOWN	SYBR	None	26.2605	26.4723	0.256498	9.26919
95	E6	FALSE	SH1-2	HNF4A	UNKNOWN	SYBR	None	27.5652	27.5164	0.463763	9.2889
96	F6	FALSE	SH1-3	HNF4A	UNKNOWN	SYBR	None	27.2399	27.6545	0.764525	9.48559
97	G6	FALSE	SH2-1	HNF4A	UNKNOWN	SYBR	None	26.1256	26.3503	0.219523	8.94618
98	H6	FALSE	SH2-2	HNF4A	UNKNOWN	SYBR	None	26.0456	26.5661	0.773998	9.5763
99	I6	FALSE	SH2-3	HNF4A	UNKNOWN	SYBR	None	26.5646	26.549	0.0915609	9.18724
100	J6	FALSE	NCP-1	HNF4A	UNKNOWN	SYBR	None	25.6446	25.3812	0.260061	8.00167
101	K6	FALSE	NCP-2	HNF4A	UNKNOWN	SYBR	None	25.1296	25.5643	0.577268	7.87602
102	L6	FALSE	NCP-3	HNF4A	UNKNOWN	SYBR	None	25.9408	25.1367	0.738118	7.44915
103	M6	FALSE	SH1P-1	HNF4A	UNKNOWN	SYBR	None	24.7015	24.9965	0.257506	8.76195
104	N6	FALSE	SH1P-2	HNF4A	UNKNOWN	SYBR	None	27.354	27.1768	0.201679	9.74339
105	O6	FALSE	SH1P-3	HNF4A	UNKNOWN	SYBR	None	26.2894	26.5922	0.616659	8.65594
106	P6	FALSE	SH2P-1	HNF4A	UNKNOWN	SYBR	None	26.3357	27.1722	0.785825	9.60286
107	Q6	FALSE	SH2P-2	HNF4A	UNKNOWN	SYBR	None	27.2522	26.9511	0.986633	9.76887
108	R6	FALSE	SH2P-3	HNF4A	UNKNOWN	SYBR	None	27.8887	27.2332	0.721775	9.38993
109	A7	FALSE	NC-1	POR	UNKNOWN	SYBR	None	24.7186	24.2532	0.408032	6.69876
110	B7	FALSE	NC-2	POR	UNKNOWN	SYBR	None	25.3317	25.7671	0.380472	6.71528
111	C7	FALSE	NC-3	POR	UNKNOWN	SYBR	None	24.0923	24.2415	0.537898	6.75358
112	D7	FALSE	SH1-1	POR	UNKNOWN	SYBR	None	24.0181	24.4712	0.446057	7.26804
113	E7	FALSE	SH1-2	POR	UNKNOWN	SYBR	None	25.6625	26.2218	0.525135	7.99435
114	F7	FALSE	SH1-3	POR	UNKNOWN	SYBR	None	26.1856	26.0806	0.753474	7.91169
115	G7	FALSE	SH2-1	POR	UNKNOWN	SYBR	None	25.3757	25.3071	0.0721402	7.90295
116	H7	FALSE	SH2-2	POR	UNKNOWN	SYBR	None	24.4392	24.6358	0.170798	7.646
117	I7	FALSE	SH2-3	POR	UNKNOWN	SYBR	None	25.3903	24.7375	0.626498	7.37567
118	J7	FALSE	NCP-1	POR	UNKNOWN	SYBR	None	22.9514	23.0165	0.506364	5.63694
119	K7	FALSE	NCP-2	POR	UNKNOWN	SYBR	None	23.4717	23.9612	0.528272	6.27287
120	L7	FALSE	NCP-3	POR	UNKNOWN	SYBR	None	23.5099	23.4463	0.0627635	5.7587
121	M7	FALSE	SH1P-1	POR	UNKNOWN	SYBR	None	21.3453	21.9318	0.576659	5.6973
122	N7	FALSE	SH1P-2	POR	UNKNOWN	SYBR	None	22.6937	23.0362	0.301518	5.60282
123	O7	FALSE	SH1P-3	POR	UNKNOWN	SYBR	None	23.4721	23.533	0.0618979	5.59675
124	P7	FALSE	SH2P-1	POR	UNKNOWN	SYBR	None	22.3428	23.2354	0.822157	5.66608
125	Q7	FALSE	SH2P-2	POR	UNKNOWN	SYBR	None	22.9105	23.0113	0.149515	5.82906
126	R7	FALSE	SH2P-3	POR	UNKNOWN	SYBR	None	24.3265	23.7109	0.534939	5.86758
127	A8	FALSE	NC-1	POR	UNKNOWN	SYBR	None	23.957	24.2532	0.408032	6.69876
128	B8	FALSE	NC-2	POR	UNKNOWN	SYBR	None	25.9337	25.7671	0.380472	6.71528
129	C8	FALSE	NC-3	POR	UNKNOWN	SYBR	None	24.8382	24.2415	0.537898	6.75358
130	D8	FALSE	SH1-1	POR	UNKNOWN	SYBR	None	24.9099	24.4712	0.446057	7.26804
131	E8	FALSE	SH1-2	POR	UNKNOWN	SYBR	None	26.7043	26.2218	0.525135	7.99435
132	F8	FALSE	SH1-3	POR	UNKNOWN	SYBR	None	25.2802	26.0806	0.753474	7.91169
133	G8	FALSE	SH2-1	POR	UNKNOWN	SYBR	None	25.3138	25.3071	0.0721402	7.90295
134	H8	FALSE	SH2-2	POR	UNKNOWN	SYBR	None	24.7481	24.6358	0.170798	7.646
135	I8	FALSE	SH2-3	POR	UNKNOWN	SYBR	None	24.6809	24.7375	0.626498	7.37567
136	J8	FALSE	NCP-1	POR	UNKNOWN	SYBR	None	23.5522	23.0165	0.506364	5.63694
137	K8	FALSE	NCP-2	POR	UNKNOWN	SYBR	None	23.8906	23.9612	0.528272	6.27287
138	L8	FALSE	NCP-3	POR	UNKNOWN	SYBR	None	23.4445	23.4463	0.0627635	5.7587
139	M8	FALSE	SH1P-1	POR	UNKNOWN	SYBR	None	22.4981	21.9318	0.576659	5.6973
140	N8	FALSE	SH1P-2	POR	UNKNOWN	SYBR	None	23.2615	23.0362	0.301518	5.60282
141	O8	FALSE	SH1P-3	POR	UNKNOWN	SYBR	None	23.531	23.533	0.0618979	5.59675
142	P8	FALSE	SH2P-1	POR	UNKNOWN	SYBR	None	23.4016	23.2354	0.822157	5.66608
143	Q8	FALSE	SH2P-2	POR	UNKNOWN	SYBR	None	23.1831	23.0113	0.149515	5.82906
144	R8	FALSE	SH2P-3	POR	UNKNOWN	SYBR	None	23.447	23.7109	0.534939	5.86758
145	A9	FALSE	NC-1	POR	UNKNOWN	SYBR	None	24.0839	24.2532	0.408032	6.69876
146	B9	FALSE	NC-2	POR	UNKNOWN	SYBR	None	26.0358	25.7671	0.380472	6.71528
147	C9	FALSE	NC-3	POR	UNKNOWN	SYBR	None	23.794	24.2415	0.537898	6.75358
148	D9	FALSE	SH1-1	POR	UNKNOWN	SYBR	None	24.4855	24.4712	0.446057	7.26804
149	E9	FALSE	SH1-2	POR	UNKNOWN	SYBR	None	26.2986	26.2218	0.525135	7.99435
150	F9	FALSE	SH1-3	POR	UNKNOWN	SYBR	None	26.7761	26.0806	0.753474	7.91169
151	G9	FALSE	SH2-1	POR	UNKNOWN	SYBR	None	25.2319	25.3071	0.0721402	7.90295
152	H9	FALSE	SH2-2	POR	UNKNOWN	SYBR	None	24.72	24.6358	0.170798	7.646
153	I9	FALSE	SH2-3	POR	UNKNOWN	SYBR	None	24.1412	24.7375	0.626498	7.37567
154	J9	FALSE	NCP-1	POR	UNKNOWN	SYBR	None	22.5457	23.0165	0.506364	5.63694
155	K9	FALSE	NCP-2	POR	UNKNOWN	SYBR	None	24.5212	23.9612	0.528272	6.27287
156	L9	FALSE	NCP-3	POR	UNKNOWN	SYBR	None	23.3844	23.4463	0.0627635	5.7587
157	M9	FALSE	SH1P-1	POR	UNKNOWN	SYBR	None	21.952	21.9318	0.576659	5.6973
158	N9	FALSE	SH1P-2	POR	UNKNOWN	SYBR	None	23.1534	23.0362	0.301518	5.60282
159	O9	FALSE	SH1P-3	POR	UNKNOWN	SYBR	None	23.5958	23.533	0.0618979	5.59675
160	P9	FALSE	SH2P-1	POR	UNKNOWN	SYBR	None	23.9617	23.2354	0.822157	5.66608
161	Q9	FALSE	SH2P-2	POR	UNKNOWN	SYBR	None	22.9403	23.0113	0.149515	5.82906
162	R9	FALSE	SH2P-3	POR	UNKNOWN	SYBR	None	23.3592	23.7109	0.534939	5.86758

## Sheet: Figure4A-H23
Well	Well Position	Omit	Sample Name	Target Name	Task	Reporter	Quencher	CT	Ct Mean	Ct SD	Delta Ct Mean
1	A1	FALSE	NC-1	ACTB	UNKNOWN	SYBR	None	17.8952	17.7116	0.194746
2	B1	FALSE	NC-2	ACTB	UNKNOWN	SYBR	None	17.0782	17.7517	0.693616
3	C1	FALSE	NC-3	ACTB	UNKNOWN	SYBR	None	17.6226	17.4984	0.110395
4	D1	FALSE	OE-1	ACTB	UNKNOWN	SYBR	None	17.4613	17.7709	0.312708
5	E1	FALSE	OE-2	ACTB	UNKNOWN	SYBR	None	15.845	16.6762	0.760364
6	F1	FALSE	OE-3	ACTB	UNKNOWN	SYBR	None	18.3477	18.4092	0.23629
7	G1	FALSE	NCP-1	ACTB	UNKNOWN	SYBR	None	17.9158	17.43	0.421507
8	H1	FALSE	NCP-2	ACTB	UNKNOWN	SYBR	None	17.9864	17.4401	0.478756
9	I1	FALSE	NCP-3	ACTB	UNKNOWN	SYBR	None	16.5008	16.539	0.285197
10	J1	FALSE	OEP-1	ACTB	UNKNOWN	SYBR	None	16.9935	16.7553	0.23638
11	K1	FALSE	OEP-2	ACTB	UNKNOWN	SYBR	None	18.0638	18.4481	0.383772
12	L1	FALSE	OEP-3	ACTB	UNKNOWN	SYBR	None	17.6761	17.7322	0.0515744
13	A2	FALSE	NC-1	ACTB	UNKNOWN	SYBR	None	17.7323	17.7116	0.194746
14	B2	FALSE	NC-2	ACTB	UNKNOWN	SYBR	None	18.4638	17.7517	0.693616
15	C2	FALSE	NC-3	ACTB	UNKNOWN	SYBR	None	17.4114	17.4984	0.110395
16	D2	FALSE	OE-1	ACTB	UNKNOWN	SYBR	None	17.7648	17.7709	0.312708
17	E2	FALSE	OE-2	ACTB	UNKNOWN	SYBR	None	17.3368	16.6762	0.760364
18	F2	FALSE	OE-3	ACTB	UNKNOWN	SYBR	None	18.6702	18.4092	0.23629
19	G2	FALSE	NCP-1	ACTB	UNKNOWN	SYBR	None	17.2121	17.43	0.421507
20	H2	FALSE	NCP-2	ACTB	UNKNOWN	SYBR	None	17.2405	17.4401	0.478756
21	I2	FALSE	NCP-3	ACTB	UNKNOWN	SYBR	None	16.2748	16.539	0.285197
22	J2	FALSE	OEP-1	ACTB	UNKNOWN	SYBR	None	16.5207	16.7553	0.23638
23	K2	FALSE	OEP-2	ACTB	UNKNOWN	SYBR	None	18.8313	18.4481	0.383772
24	L2	FALSE	OEP-3	ACTB	UNKNOWN	SYBR	None	17.7431	17.7322	0.0515744
25	A3	FALSE	NC-1	ACTB	UNKNOWN	SYBR	None	17.5074	17.7116	0.194746
26	B3	FALSE	NC-2	ACTB	UNKNOWN	SYBR	None	17.7129	17.7517	0.693616
27	C3	FALSE	NC-3	ACTB	UNKNOWN	SYBR	None	17.4611	17.4984	0.110395
28	D3	FALSE	OE-1	ACTB	UNKNOWN	SYBR	None	18.0866	17.7709	0.312708
29	E3	FALSE	OE-2	ACTB	UNKNOWN	SYBR	None	16.8467	16.6762	0.760364
30	F3	FALSE	OE-3	ACTB	UNKNOWN	SYBR	None	18.2098	18.4092	0.23629
31	G3	FALSE	NCP-1	ACTB	UNKNOWN	SYBR	None	17.162	17.43	0.421507
32	H3	FALSE	NCP-2	ACTB	UNKNOWN	SYBR	None	17.0935	17.4401	0.478756
33	I3	FALSE	NCP-3	ACTB	UNKNOWN	SYBR	None	16.8413	16.539	0.285197
34	J3	FALSE	OEP-1	ACTB	UNKNOWN	SYBR	None	16.7516	16.7553	0.23638
35	K3	FALSE	OEP-2	ACTB	UNKNOWN	SYBR	None	18.4492	18.4481	0.383772
36	L3	FALSE	OEP-3	ACTB	UNKNOWN	SYBR	None	17.7774	17.7322	0.0515744
37	A4	FALSE	NC-1	HNF4A	UNKNOWN	SYBR	None	31.9135	30.8556	0.996998	13.144
38	B4	FALSE	NC-2	HNF4A	UNKNOWN	SYBR	None	30.8722	30.578	0.677028	12.8264
39	C4	FALSE	NC-3	HNF4A	UNKNOWN	SYBR	None	30.2689	30.8058	0.525702	13.3074
40	D4	FALSE	OE-1	HNF4A	UNKNOWN	SYBR	None	26.0136	26.6001	0.54172	8.82918
41	E4	FALSE	OE-2	HNF4A	UNKNOWN	SYBR	None	25.4991	25.6193	0.145602	8.94316
42	F4	FALSE	OE-3	HNF4A	UNKNOWN	SYBR	None	27.2956	26.9494	0.448178	8.54016
43	G4	FALSE	NCP-1	HNF4A	UNKNOWN	SYBR	None	29.8728	29.9541	0.070839	12.5242
44	H4	FALSE	NCP-2	HNF4A	UNKNOWN	SYBR	None	30.7005	30.5833	0.185181	13.1432
45	I4	FALSE	NCP-3	HNF4A	UNKNOWN	SYBR	None	29.046	29.4062	0.317682	12.8672
46	J4	FALSE	OEP-1	HNF4A	UNKNOWN	SYBR	None	26.2795	25.6741	0.574928	8.91885
47	K4	FALSE	OEP-2	HNF4A	UNKNOWN	SYBR	None	27.1626	27.735	0.496	9.28687
48	L4	FALSE	OEP-3	HNF4A	UNKNOWN	SYBR	None	25.9833	26.4176	0.376847	8.68539
49	A5	FALSE	NC-1	HNF4A	UNKNOWN	SYBR	None	29.9334	30.8556	0.996998	13.144
50	B5	FALSE	NC-2	HNF4A	UNKNOWN	SYBR	None	29.8037	30.578	0.677028	12.8264
51	C5	FALSE	NC-3	HNF4A	UNKNOWN	SYBR	None	31.3196	30.8058	0.525702	13.3074
52	D5	FALSE	OE-1	HNF4A	UNKNOWN	SYBR	None	27.0818	26.6001	0.54172	8.82918
53	E5	FALSE	OE-2	HNF4A	UNKNOWN	SYBR	None	25.5776	25.6193	0.145602	8.94316
54	F5	FALSE	OE-3	HNF4A	UNKNOWN	SYBR	None	27.1093	26.9494	0.448178	8.54016
55	G5	FALSE	NCP-1	HNF4A	UNKNOWN	SYBR	None	29.9874	29.9541	0.070839	12.5242
56	H5	FALSE	NCP-2	HNF4A	UNKNOWN	SYBR	None	30.6797	30.5833	0.185181	13.1432
57	I5	FALSE	NCP-3	HNF4A	UNKNOWN	SYBR	None	29.5261	29.4062	0.317682	12.8672
58	J5	FALSE	OEP-1	HNF4A	UNKNOWN	SYBR	None	25.6074	25.6741	0.574928	8.91885
59	K5	FALSE	OEP-2	HNF4A	UNKNOWN	SYBR	None	28.0051	27.735	0.496	9.28687
60	L5	FALSE	OEP-3	HNF4A	UNKNOWN	SYBR	None	26.6108	26.4176	0.376847	8.68539
61	A6	FALSE	NC-1	HNF4A	UNKNOWN	SYBR	None	30.7199	30.8556	0.996998	13.144
62	B6	FALSE	NC-2	HNF4A	UNKNOWN	SYBR	None	31.0582	30.578	0.677028	12.8264
63	C6	FALSE	NC-3	HNF4A	UNKNOWN	SYBR	None	30.829	30.8058	0.525702	13.3074
64	D6	FALSE	OE-1	HNF4A	UNKNOWN	SYBR	None	26.7048	26.6001	0.54172	8.82918
65	E6	FALSE	OE-2	HNF4A	UNKNOWN	SYBR	None	25.7813	25.6193	0.145602	8.94316
66	F6	FALSE	OE-3	HNF4A	UNKNOWN	SYBR	None	26.4432	26.9494	0.448178	8.54016
67	G6	FALSE	NCP-1	HNF4A	UNKNOWN	SYBR	None	30.0022	29.9541	0.070839	12.5242
68	H6	FALSE	NCP-2	HNF4A	UNKNOWN	SYBR	None	30.3699	30.5833	0.185181	13.1432
69	I6	FALSE	NCP-3	HNF4A	UNKNOWN	SYBR	None	29.6465	29.4062	0.317682	12.8672
70	J6	FALSE	OEP-1	HNF4A	UNKNOWN	SYBR	None	25.1355	25.6741	0.574928	8.91885
71	K6	FALSE	OEP-2	HNF4A	UNKNOWN	SYBR	None	28.0373	27.735	0.496	9.28687
72	L6	FALSE	OEP-3	HNF4A	UNKNOWN	SYBR	None	26.6587	26.4176	0.376847	8.68539
73	A7	FALSE	NC-1	POR	UNKNOWN	SYBR	None	25.8608	25.8592	0.0370456	8.14761
74	B7	FALSE	NC-2	POR	UNKNOWN	SYBR	None	25.1566	25.7426	0.509767	7.99096
75	C7	FALSE	NC-3	POR	UNKNOWN	SYBR	None	25.2163	25.3208	1.30623	7.82237
76	D7	FALSE	OE-1	POR	UNKNOWN	SYBR	None	25.2509	24.8711	0.500369	7.10023
77	E7	FALSE	OE-2	POR	UNKNOWN	SYBR	None	24.7121	24.1266	0.806525	7.4504
78	F7	FALSE	OE-3	POR	UNKNOWN	SYBR	None	25.6804	25.5909	0.248737	7.18164
79	G7	FALSE	NCP-1	POR	UNKNOWN	SYBR	None	27.1194	26.6757	0.421486	9.2457
80	H7	FALSE	NCP-2	POR	UNKNOWN	SYBR	None	26.2422	26.359	0.15965	8.91889
81	I7	FALSE	NCP-3	POR	UNKNOWN	SYBR	None	25.3591	25.7354	0.336677	9.19644
82	J7	FALSE	OEP-1	POR	UNKNOWN	SYBR	None	25.5128	25.4637	0.433689	8.70841
83	K7	FALSE	OEP-2	POR	UNKNOWN	SYBR	None	27.8128	27.5129	0.409166	9.06474
84	L7	FALSE	OEP-3	POR	UNKNOWN	SYBR	None	26.3035	26.3956	0.358187	8.66343
85	A8	FALSE	NC-1	POR	UNKNOWN	SYBR	None	25.8955	25.8592	0.0370456	8.14761
86	B8	FALSE	NC-2	POR	UNKNOWN	SYBR	None	25.9878	25.7426	0.509767	7.99096
87	C8	FALSE	NC-3	POR	UNKNOWN	SYBR	None	26.6761	25.3208	1.30623	7.82237
88	D8	FALSE	OE-1	POR	UNKNOWN	SYBR	None	24.3041	24.8711	0.500369	7.10023
89	E8	FALSE	OE-2	POR	UNKNOWN	SYBR	None	24.4611	24.1266	0.806525	7.4504
90	F8	FALSE	OE-3	POR	UNKNOWN	SYBR	None	25.7825	25.5909	0.248737	7.18164
91	G8	FALSE	NCP-1	POR	UNKNOWN	SYBR	None	26.2807	26.6757	0.421486	9.2457
92	H8	FALSE	NCP-2	POR	UNKNOWN	SYBR	None	26.5409	26.359	0.15965	8.91889
93	I8	FALSE	NCP-3	POR	UNKNOWN	SYBR	None	26.008	25.7354	0.336677	9.19644
94	J8	FALSE	OEP-1	POR	UNKNOWN	SYBR	None	25.0075	25.4637	0.433689	8.70841
95	K8	FALSE	OEP-2	POR	UNKNOWN	SYBR	None	27.679	27.5129	0.409166	9.06474
96	L8	FALSE	OEP-3	POR	UNKNOWN	SYBR	None	26.7909	26.3956	0.358187	8.66343
97	A9	FALSE	NC-1	POR	UNKNOWN	SYBR	None	25.8214	25.8592	0.0370456	8.14761
98	B9	FALSE	NC-2	POR	UNKNOWN	SYBR	None	26.0835	25.7426	0.509767	7.99096
99	C9	FALSE	NC-3	POR	UNKNOWN	SYBR	None	24.0699	25.3208	1.30623	7.82237
100	D9	FALSE	OE-1	POR	UNKNOWN	SYBR	None	25.0584	24.8711	0.500369	7.10023
101	E9	FALSE	OE-2	POR	UNKNOWN	SYBR	None	23.2066	24.1266	0.806525	7.4504
102	F9	FALSE	OE-3	POR	UNKNOWN	SYBR	None	25.3098	25.5909	0.248737	7.18164
103	G9	FALSE	NCP-1	POR	UNKNOWN	SYBR	None	26.6268	26.6757	0.421486	9.2457
104	H9	FALSE	NCP-2	POR	UNKNOWN	SYBR	None	26.2939	26.359	0.15965	8.91889
105	I9	FALSE	NCP-3	POR	UNKNOWN	SYBR	None	25.8392	25.7354	0.336677	9.19644
106	J9	FALSE	OEP-1	POR	UNKNOWN	SYBR	None	25.8707	25.4637	0.433689	8.70841
107	K9	FALSE	OEP-2	POR	UNKNOWN	SYBR	None	27.0468	27.5129	0.409166	9.06474
108	L9	FALSE	OEP-3	POR	UNKNOWN	SYBR	None	26.0926	26.3956	0.358187	8.66343
