# Supplementary material for: Hepatic nuclear factor 4 alpha promotes the ferroptosis of lung adenocarcinoma via transcriptional activation of cytochrome P450 oxidoreductase
Source: PeerJ. 2023 May 8;11:e15377. doi: 10.7717/peerj.15377 (PMC10174064; doi:10.7717/peerj.15377)
Supplement: Supplemental Information 13 [file peerj-11-15377-s013.xlsx]

## Sheet: Figure 4C-A549
HNF4A-NC	RSL3 (uM)						percentages
	0	6107.71	6177.52	5726.82	6365.8	6170.35		0.99966	1.01195	0.932588	1.04511	1.01069
	1	5495.22	5798.14	5701.2	5415.3	5826.86		0.891805	0.945146	0.928076	0.877732	0.950204
	2	4331.41	3595.27	3839.3	4470.09	4511.56		0.686865	0.557234	0.600207	0.711286	0.718588
	5	2658.02	2549.97	2222.07	2766.14	2715.86		0.39219	0.373164	0.315421	0.41123	0.402375
	10	1411.16	1279.02	912.626	1251.59	1876.61		0.172625	0.149357	0.0848367	0.144526	0.254588
	Blank	433.821	443.307	444.518	403.742	428.896
HNF4A-SH1	RSL3 (uM)						percentages
	0	5885.77	5730.34	5274.88	5503.64	5052.85		1.07845	1.04768	0.95751	1.0028	0.913552
	1	4759.29	5300.86	5429.25	5334.88	4952.99		0.855433	0.962654	0.988073	0.96939	0.893782
	2	3836.3	3664.91	4203.37	4230.1	4363.15		0.6727	0.638768	0.745372	0.750664	0.777005
	5	3110.72	3350.15	2928.59	3390.58	3178.55		0.529049	0.576452	0.49299	0.584457	0.542478
	10	1881.32	2401.59	2359.93	2301	2399.32		0.285652	0.388655	0.380408	0.368741	0.388206
	Blank	445.731	445.676	427.048	417.143	456.853
HNF4A-SH2	RSL3 (uM)						percentages
	0	6042.44	6062.78	5672	5418.55	5509.2		1.05728	1.06114	0.98689	0.938734	0.955958
	1	5624.18	5416.39	5340.78	5231.25	5547.64		0.977805	0.938324	0.923957	0.903146	0.963261
	2	4745.39	4681.98	4325.49	4656.06	4514.25		0.810829	0.79878	0.731044	0.793856	0.76691
	5	4027.97	3267.14	3455.05	3973.06	3488.84		0.674514	0.529952	0.565655	0.664081	0.572077
	10	2712.8	1652.84	2561.44	2303.29	2301.09		0.424623	0.223225	0.395864	0.346814	0.346397
	Blank	469.138	464.01	498.773	489.426	468.726
HNF4A-NC+POR-OE	RSL3 (uM)
	0	6468.91	6243	6630.75	6118.95	5943.57		1.0323	0.993461	1.06012	0.972135	0.941987
	1	5442.27	5767.96	4929.21	4935.65	5215.74		0.855808	0.911797	0.767608	0.768716	0.816865
	2	3280.56	4104.13	4029.41	3792.16	4122.09		0.48419	0.62577	0.612925	0.57214	0.628857
	5	1540.87	2437.18	1491.88	1431.78	2079.41		0.185121	0.339206	0.176699	0.166367	0.277701
	10	1064.57	1054.78	810.111	1139.91	1568.05		0.103241	0.101558	0.0594974	0.116193	0.189794
	Blank	461.259	464.086	448.537	477.33	468.855
HNF4A-SH1+POR-OE	RSL3 (uM)
	0	5672.67	5956.06	6065.29	5596.91	5436.84		0.986312	1.03953	1.06005	0.972085	0.942024
	1	4976.74	4463.26	5113.16	4681.37	5194.89		0.85562	0.759189	0.881238	0.800149	0.896587
	2	3443.8	3461.06	3761.32	2785.14	3461.35		0.567737	0.570978	0.627367	0.444043	0.571032
	5	2223.54	1391.95	1291.84	1293.99	1957.43		0.338576	0.182405	0.163604	0.16401	0.288601
	10	1418.36	741.709	1218.62	643.447	505.689		0.187365	0.0602919	0.149854	0.0418386	0.015968
	Blank	420.793	410.047	429.085	420.285	423.095
HNF4A-SH2+POR-OE	RSL3 (uM)
	0	5473.77	5439.8	5608.77	5760.05	5567.7		0.98124	0.974618	1.00755	1.03704	0.999548
	1	4297.01	5004.74	4957.16	5168.09	4410.67		0.751871	0.889819	0.880544	0.921659	0.774025
	2	3320.87	3572.86	3193.69	2781.61	3354.76		0.561607	0.610725	0.536819	0.456498	0.568212
	5	1593.25	1240.35	2108.62	1666.86	2118.38		0.224868	0.156084	0.325321	0.239216	0.327225
	10	628.526	983.344	650.939	1193.21	1250.32		0.0368297	0.105989	0.0411983	0.146896	0.158027
	Blank	424.235	431.724	455.701	464.112	422.095
HNF4A-NC	IKE (uM)
	0	6019.27	6663.55	5813.29	6581.91	6608.28		0.945763	1.05565	0.91063	1.04173	1.04623
	2	5010.5	4883.49	4234.43	4597.5	5180.43		0.773705	0.752041	0.641337	0.703263	0.802688
	5	2952.2	2807.42	2821.17	2936.45	3233.96		0.422637	0.397943	0.400288	0.419951	0.470694
	10	2706.89	2561.61	2380.72	2706.37	2581.53		0.380796	0.356015	0.325162	0.380707	0.359413
	20	2063.88	2301.97	2219.5	2310.11	2419.28		0.271121	0.311732	0.297665	0.31312	0.331741
	Blank	489.269	486.201	465.388	463.523	467.122
HNF4A-SH1	IKE (uM)
	0	7191.46	6190.34	6138.55	6662.02	7000.92		1.09025	0.927397	0.918972	1.00413	1.05926
	2	4925.94	5627.09	5532.59	5180.21	5308.92		0.721715	0.835771	0.820399	0.763077	0.784015
	5	3484.72	3710.36	3859	3918.17	4556.14		0.487268	0.523973	0.548153	0.557778	0.661559
	10	3482.14	3277.03	4066.48	3762.76	3391.11		0.486849	0.453483	0.581904	0.532497	0.47204
	20	2835.38	2509.84	2977.39	2905.09	2403.11		0.381639	0.328683	0.404739	0.392979	0.311321
	Blank	508.614	466.314	495.295	501.113	475.245
HNF4A-SH2	IKE (uM)
	0	5896.52	5845.56	6500.16	6455.62	6591.43		0.938141	0.929418	1.04148	1.03386	1.05711
	2	5461.05	5850.34	5031.26	5797.46	5442.01		0.863593	0.930237	0.790017	0.921183	0.860334
	5	4289.22	3613.81	3802.86	4370.4	3922.76		0.662985	0.547361	0.579725	0.676882	0.600251
	10	3495.1	3454.66	3552.39	3896.12	3627.09		0.527038	0.520115	0.536845	0.595691	0.549634
	20	3172.78	2712.57	2935.89	3410.28	3699.41		0.471859	0.393075	0.431306	0.512518	0.562014
	Blank	410.199	413.826	407.181	448.007	403.068
HNF4A-NC+POR-OE	IKE (uM)
	0	5906.77	5419.18	5559.89	5369.48	5744.05		1.05937	0.965042	0.992264	0.955427	1.02789
	2	3777.6	3219.95	3632.38	3255.55	4146.33		0.647453	0.539567	0.619357	0.546453	0.718789
	5	2140.26	2327.71	2202.69	2188.84	1765.43		0.330684	0.366948	0.342762	0.340082	0.258166
	10	1503.53	1488.91	1637.18	1863.42	1771.24		0.207498	0.20467	0.233355	0.277125	0.259291
	20	1514.07	1609.57	1326.21	1533.35	1420.9		0.209537	0.228013	0.173192	0.213267	0.191512
	Blank	417.251	431.84	440.707	419.322	445.867
HNF4A-SH1+POR-OE	IKE (uM)
	0	6708.48	6259.91	6057.61	5891.84	6359.92		1.07832	1.00075	0.96577	0.937104	1.01805
	2	4485.28	4031.01	3493.5	3510.49	3478.93		0.693872	0.615318	0.522368	0.525306	0.519847
	5	2535.38	2552.36	2362.93	2084.64	2566.21		0.356683	0.359619	0.326862	0.278738	0.362014
	10	1329.24	1474.85	2182.8	2186.03	1289.41		0.148109	0.173288	0.295712	0.29627	0.141221
	20	1445.19	1359.62	1924.46	1572.22	1905.22		0.168159	0.153362	0.251037	0.190126	0.247711
	Blank	452.755	457.33	468.093	487.472	498.144
HNF4A-SH2+POR-OE	IKE (uM)
	0	5533.7	5743.78	6122.01	6381.19	5613.63		0.936259	0.975055	1.0449	1.09276	0.95102
	2	3866.72	4184.51	3551.2	3354.6	3659.92		0.628418	0.687105	0.570152	0.533845	0.59023
	5	2640.82	2758.95	2244.42	1826.95	2746.87		0.402032	0.423849	0.328829	0.251737	0.421617
	10	1722.88	1813.98	1803.63	2111.94	2079.92		0.232516	0.249342	0.24743	0.304365	0.298451
	20	1903.17	2134.39	1657.5	1284.08	1674.26		0.265811	0.30851	0.220444	0.151485	0.223539
	Blank	428.845	466.996	450.103	477.009	495.942

## Sheet: Figure 4C-H23
HNF4A-NC	RSL3 (uM)						percentages
	0	3887.89	4288.61	3797.48	4214.07	3938.11		0.961438	1.07395	0.936055	1.05302	0.97554
	1	3274.84	3189.16	3403.07	3134	3366.78		0.789314	0.765257	0.825318	0.749771	0.81513
	2	2549.08	2447.97	2294.48	2745.35	2959.12		0.585545	0.557156	0.514061	0.640652	0.700671
	5	1790.36	1814.61	1610.66	1951.33	1753.67		0.37252	0.37933	0.322068	0.417715	0.36222
	10	1254.81	1252.64	1425.04	1206.62	1393.96		0.222156	0.221548	0.269951	0.208627	0.261226
	Blank	421.078	496.444	463.564	461.113	475.611
HNF4A-OE	RSL3 (uM)						percentages
	0	3701.16	4063.39	4051.64	3997.37	4250.35		0.912108	1.01427	1.01096	0.995653	1.067
	1	3607.72	3877.22	3997.25	3605.44	3545.11		0.885754	0.961766	0.99562	0.885111	0.868096
	2	2891.53	3078.59	3270.55	2938.81	2859.94		0.683758	0.736517	0.790658	0.697092	0.674848
	5	2506.19	2543.45	2619.16	2310.22	2199.79		0.575074	0.585581	0.606935	0.5198	0.488654
	10	1714.83	1726.14	1575.93	1432.47	1583.46		0.351874	0.355064	0.312699	0.272236	0.314821
	Blank	426.997	461.715	468.367	487.892	491.277
HNF4A-NC+POR-SH	RSL3 (uM)						percentages
	0	3920.79	4074.3	4121.42	4094.88	4045.73		0.963472	1.0064	1.01957	1.01215	0.998408
	1	3531.07	4031.9	3751.81	3961.54	3926.87		0.854496	0.994541	0.916221	0.974867	0.965172
	2	3173.31	3434.78	3440.48	3122.64	3382.87		0.754459	0.827571	0.829167	0.740292	0.813057
	5	3333.58	2695.16	2688.84	2888.12	2933.67		0.799275	0.620758	0.618992	0.674715	0.687452
	10	2300.25	1930.85	1799.26	2294.96	2268.35		0.510334	0.407042	0.370247	0.508854	0.501414
	Blank	465.375	494.676	467.55	475.208	472.995
HNF4A-OE+POR-SH	RSL3 (uM)						percentages
	0	4525.81	4076.52	4047.29	4109.66	4465.73		1.07445	0.955329	0.947577	0.964114	1.05853
	1	4112.41	4224.39	3849.74	4089.75	3741.98		0.964843	0.994534	0.895198	0.958834	0.866625
	2	3370.59	3481.34	3393.36	3323.99	3360.28		0.768154	0.797519	0.774189	0.755798	0.765418
	5	3196.14	3086.45	3010.1	3101.24	2943.26		0.721898	0.692815	0.672569	0.696736	0.654848
	10	2177.75	2271.52	2351.67	1939.97	1860.97		0.451876	0.476738	0.497989	0.388827	0.367882
	Blank	469.4	469.894	474.53	471.087	482.611
HNF4A-NC	IKE (uM)						percentages
	0	4359.38	4517.06	4188.21	4054.01	3941.27		1.03959	1.08195	0.993613	0.957562	0.927279
	2	3348.04	3004.98	3427.89	3196.18	3131.47		0.767919	0.675765	0.78937	0.727126	0.709744
	5	1973.19	2210.59	2342.68	2349	2377.72		0.398598	0.462369	0.497853	0.49955	0.507264
	10	1424.65	1876.69	1926.06	1578.46	2049.32		0.251243	0.372674	0.385938	0.292562	0.419048
	20	1533.01	1167.75	1409.65	1482.87	954.958		0.280352	0.182234	0.247215	0.266884	0.125072
	Blank	487.63	497.811	494.314	484.924	482.137
HNF4A-OE	IKE (uM)						percentages
	0	3764.31	4158.96	3861.16	3624.48	4143.09		0.957504	1.0723	0.985678	0.916828	1.06769
	2	3283.38	3102.32	3135.51	3163.43	3278.05		0.817606	0.764938	0.774595	0.782716	0.816056
	5	2946.14	2768.65	2736.26	2999.26	2718.59		0.719508	0.667879	0.658457	0.734962	0.653317
	10	2454.45	2259.35	2223.54	2248.2	2422.18		0.576483	0.519731	0.509313	0.516486	0.567094
	20	1852.53	2012.38	2038.6	1732.22	1995.85		0.401389	0.447889	0.455514	0.366395	0.44308
	Blank	473.673	458.195	466.2	468.983	496.202
HNF4A-NC+POR-SH	IKE (uM)						percentages
	0	4372.58	4139.87	4539.94	3853.18	4274.63		1.03635	0.9744	1.0809	0.898084	1.01027
	2	3516.29	4203	4152.46	3926.69	3595.18		0.808404	0.991205	0.977752	0.917653	0.829403
	5	3400.43	3235.23	3654.99	3278.86	3769.77		0.777563	0.733587	0.845326	0.745201	0.875881
	10	2970.43	2973.28	3184.84	3001.87	3009.45		0.663095	0.663856	0.720172	0.671466	0.673483
	20	2162.42	2452.64	2739.93	2733.86	2357.24		0.448005	0.525261	0.601738	0.600122	0.499865
	Blank	480.17	479.707	484.677	472.322	480.355
HNF4A-OE+POR-SH	IKE (uM)						percentages
	0	3985	3557.49	3494.28	3937.74	3540.57		1.08723	0.954979	0.935426	1.07261	0.949747
	2	3548.17	3543.15	3084.13	3334.08	3687.71		0.952098	0.950545	0.80854	0.885865	0.995264
	5	2810.19	3130.88	3156.84	2999.3	3209.91		0.723796	0.823003	0.831034	0.782298	0.847453
	10	2736.07	2529.34	2862.09	2977.77	2739.05		0.700865	0.636912	0.739849	0.775637	0.701786
	20	2216.58	2511.49	2350.16	2320.93	2340.4		0.540155	0.631389	0.58148	0.572438	0.578461
	Blank	473.1	450.28	495.455	465.752	468.126
	Blank
